*Rodriguez et al.*

1 **Population colonization history influences behavioral responses of European starlings**  
2 **in personality tests**

3

4 Alexandra Rodriguez PhD<sup>1,2</sup>, Martine Hausberger PhD<sup>2</sup>, Patricia Le Quilliec IA<sup>1</sup>, Philippe

5 Clergeau PhD<sup>3</sup>, Laurence Henry PhD<sup>2</sup>

6 Alexandra Rodriguez (corresponding author)

7 <sup>1</sup>INRAe Scribe - UMR Ecologie et Santé des Ecosystèmes, Campus de Beaulieu,

8 Ecologie des Invasions

9 Agrocampus Ouest 35042 Rennes cedex, France

10 rodrialexandra@gmail.com

11

12 <sup>2</sup> Université de Rennes, Université de Caen-Normandie UMR 6552 Ethologie animale et

13 humaine, CNRS , Campus de Beaulieu, 35042 Rennes cedex, France

14 <sup>3</sup>Museum National d'Histoire Naturelle

15 Département Homme et Environnement UMR CESCO 43 rue Buffon, CP 135, 75005 Paris,

16 France

17

18

19

20

21

22

23

24

25

26

27

28

29

30

Rodriguez *et al.*

31

32 **Abstract :**

33

34 To understand the processes involved in biological invasions, the genetic,  
35 morphological, physiological and behavioral characteristics of invasive populations need  
36 to be understood.

37 Many invasive species have been reported to be flying species. In birds, both invaders and  
38 migrants encounter novel situations, therefore one could expect that both groups might  
39 react similarly to novelty.

40 Here we analyzed the behavioral responses of individuals from three populations of  
41 European starling *Sturnus vulgaris*: a population settled for centuries in a rural region, a  
42 population that recently colonized an urban area, and a population of winter migrant birds.  
43 We conducted a social isolation test, a novel environment test, a novel food test and a novel  
44 object test to explore their reactions towards novelty. We identified and characterized  
45 different behavioral profiles for each test.

46 The group of migratory adults appeared to be less anxious in social isolation than  
47 the group of urban young. Urban and migrant groups entered the novel environment sooner  
48 than rural birds. Shy, bold and intermediate individuals were observed in all three groups  
49 when presented with novel food. Finally, the proportion of shy individuals which did not  
50 touch the novel object was higher than the proportion of bold individuals in the rural group.  
51 Our study emphasizes that neophilia or boldness present in migrant and invasive  
52 populations may facilitate the occupation of novel habitats. Our analysis also suggests that  
53 mixed reactions of neophobia ensure behavioral flexibility in a gregarious invasive species.

54

55 **Significant statement:**

56

57 In this paper, we show that an invasive species like European starling, *Sturnus*  
58 *vulgaris*, presents an important flexibility in neophobia and in reaction towards social  
59 isolation. These variations depend on the settlement history of populationseven when the  
60 birds had been wild-caught as nestlings and hand-raised in standard conditions. This is  
61 significant because it highlights possible scenarios of colonization processes.

Rodriguez *et al.*

62

63           We believe that this manuscript is appropriate for publication by Behavioral  
64 Ecology and Sociobiology because it places individuals' behavior in the core mechanisms  
65 of an ecological phenomenon as biological invasions. Our manuscript enlarges the  
66 paradigms related to the ways of coping with novelty in animals.

67

68 This manuscript has not been published and is not under consideration for publication  
69 elsewhere.

70

71

72 **Keywords:** biological invasions, colonisation, European starling, neophobia, personality,  
73 social isolation

74

## 75 **Introduction**

76

77

78           Dispersal and population growth are the two fundamental processes that ensure the  
79 expansion of populations (Skellam 1951, Phillips and Suarez 2014). Dispersal corresponds  
80 to individual movements through space (and into new spaces), and population growth to  
81 space filling (including newly colonized space) by individuals. It is generally considered  
82 that invasions occur when a species colonizes a habitat that had never been occupied before  
83 (Pascal *et al.* 2003).

84

85           Many of the most rapid and famous invasions have involved flying species, such as  
86 the House finch, *Carpodacus mexicanus*, the House sparrow *Passer domesticus*, the  
87 European starling *Sturnus vulgaris*, the Eurasian Collared dove *Streptopelia decaocto*, and  
88 the Gypsy moth, *Lymantria dispar* (Elton 1958, Veit and Lewis 1996). However, flying far  
89 away is not enough: dispersers face novel situations and habitats to which their population  
90 of origin had never adapted (Sax and Brown 2000). When an invading species spreads, it  
91 will face challenges related to novel environments, novel foods and novel objects.  
92 Individual variations in neophobia will thus determine which individuals survive, which  
settle and which do not. Leaving the original colony may also mean some degree of social

*Rodriguez et al.*

93 isolation. Many of the traits associated with invasion are behavioral traits and some of them  
94 may be dependent on individual personalities. Thus, genetic or phenotypical variability  
95 may also support and explain invasion success (Rejmanek and Richardson 1996, Wilson  
96 1998, Jason et al. 2004, Kolbe et al. 2004).

97

98 One classical definition of temperament is that it corresponds to individual  
99 behavioral characteristics that are relatively stable over time and across situations (Bates  
100 1989). For Hall et al. (1997), when temperament is refined by experience, it becomes  
101 personality. For these authors, the concept of temperament involves some deeply  
102 biologically rooted characteristic. This questions the determinism (genetic and/or  
103 epigenetic) of these interindividual differences (Digemanse et al. 2002, Hausberger et al.  
104 2004, Van Oers et al. 2004a, Groothuis and Carere 2005). Nowadays, though, both concepts  
105 tend to be used interchangeably. While relative stability of traits over time is generally  
106 interpreted as reflecting the existence of temperaments or personalities (Jones 1977a,  
107 Gosling 2001), its absence is interpreted as the expression of context or state dependent  
108 behaviors (Van Oers et al. 2005) or as the expression of behavioral flexibility (i.e. the  
109 individual can adapt its behavior to the different situations) (Pfennig et al. 1993, Neff  
110 2003). Although some studies have found evidence of genetic or acquired behavioral  
111 phenotypes (Dingemanse and Réale 2005, Pittet et al. 2013) it is generally unclear which  
112 individual differences are due to phylogenetic or population history, and which to  
113 individual experience (Fox and Millam 2004).

114 A second important question concerns the constancy of individual differences across  
115 situations (Sih et al. 2004). The question here is whether individuals with a particular  
116 behavioral response in a situation behave in a particular and systematic way in another  
117 situation, hence present “behavioral syndromes” or “coping styles” (Wechsler 1995). There  
118 is controversy in the literature with some studies finding stability across situations (Le  
119 Scolan et al. 1997, Sih et al. 2003) and others not (Coleman and Wilson 1998, Neff and  
120 Sherman 2004, Lee and Tang-Martinez 2009). These different observations may reflect  
121 either species differences, differences in the experimental procedures, or both. Habituation  
122 and learning are two processes that can also modify behavioral responses in specific  
123 contexts.

Rodriguez et al.

124 Studying personalities may be an essential aspect in the understanding of biological  
125 invasions, especially neophobia, as stress physiology and behavior are highly relevant in  
126 this context (Crane et al. 2020, Greenberg 2003, Martin and Fitzgerald 2005). For example,  
127 Atwell et al. (2012) demonstrated that there were rapid adaptive shifts in both stress  
128 physiology and positively correlated boldness behavior in a songbird, the dark-eyed junco,  
129 *Junco hyemalis* following its colonization of a novel urban environment. They found  
130 persistent population differences with both reduced corticosterone responses and bolder  
131 exploratory behavior in birds from the colonist population. Furthermore, behavioral  
132 flexibility, particularly in relation to novel stimuli and introduction into novel  
133 environments, has been suggested as a possible explanation for why some species become  
134 successful invaders (Sol et al. 2002, Wright et al. 2010, Webb et al. 2014).

135 European starlings are well known for their ability to adapt and invade a wide range  
136 of habitats, as shown by their expansion in the varied parts of the world where they had  
137 been introduced (e.g. Long 1981, Feare 1984, Craig 2020). However, both rural and urban  
138 populations can be found. Are these preferred habitats associated with particular individual  
139 behavioral characteristics or are they just a result of the availability of nest sites. Also the  
140 question arises whether young birds acquire skills to exploit the novel resources and  
141 challenges (presence of humans, vehicles...) provided by the urban habitat, or whether  
142 heritable population characteristics develop over generations.

143  
144

145 In the present study, we hypothesized that more recent urban populations may have  
146 adapted to the challenges of urban life and hence that rural and urban young birds would  
147 differ in personality traits even when experiencing the same developmental conditions. In  
148 order to test this hypothesis, we hand-raised young birds taken from the nest either in rural  
149 or urban areas of the same region, where they are sedentary. As young adults, we tested  
150 their reactions to novel situations, objects or food, after they had spent one year together  
151 under the same conditions. Since migratory populations also face novel situations, we also  
152 tested a group of migratory birds wild-caught as adults.

153  
154

155 **Methods**

Rodriguez *et al.*

156

157 *Subjects*

158 Three groups of birds (N=44) were used: two groups of sedentary birds taken from nests in  
159 the Brittany region of France, and one group of migratory birds from eastern Europe wild-  
160 caught as adults.

161 The sedentary birds comprised: the “rural group” nestlings hatched within a 20 km radius  
162 of Rennes where starlings settled more than 400 years ago (Richard 1826), while the  
163 “urban group” hatched within Rennes city, an urban area colonized 30 to 80 years ago  
164 (Clergeau 1981).

165

166 These 32 nestlings were removed from 32 different nests (one chick per nest to  
167 avoid possible sibling effects, either genetic or environmental) when they were 5-14 days  
168 old in Spring 2007 (N=18: 12 rural and 6 urban) and 2008 (N= 14, 7 rural and 7 urban). All  
169 the young birds were hand-fed using commercial pellets (Végam, Grosset) mixed with  
170 water for five weeks until they could eat independently. At the age of two months they were  
171 put in an outdoor aviary (3mx4mx2m) as a single group (one for each generation).

172 Thus, Urban and Rural individuals were always reared together.

173

174 The adult migratory group was composed of 12 adult starlings (six males and six females),  
175 captured during autumn 2006 with nets at the cliffs of Etretat in Normandy during the  
176 migration season. They were at least 2 years old at the time of capture, as estimated by  
177 feathers (Feare 1984). They were then housed in a large outdoor aviary with other adult  
178 starlings until the beginning of the experiments in autumn 2007.

179

180

181 *Behavioral tests*

182 The birds’ reactions to four different challenging situations were assessed: social  
183 separation, novel environment, novel object and novel food. To establish individual  
184 responses to familiar food (“baseline”), we also performed a test where the starlings had  
185 access to mealworms.

186

*Rodriguez et al.*

187 For all the tests we used 120 x 40 x 50 cm cages that were divided into two identical parts  
188 (part I and part II) by an opaque plastic barrier. The experimental design and the  
189 chronology of the experiments are presented in Figure 1. All tests were videorecorded using  
190 a SONY Handycam Digital 8. for later analysis. Thus, the birds were assessed in the  
191 following tests:

192

193 - Reaction to social separation:

194 The reactions of the birds when they were first in the individual cages were  
195 measured during the 10 first minutes after their arrival. During this part of the experiment  
196 there were two perches P1 and P2 in the part I of the cage and no feeding dish or a drinking  
197 trough.

198

199 - Novel environment test:

200 After the bird had habituated over 2 days to being in the part 1 of the cage, we  
201 removed the plastic barrier so that the birds had access to a larger area. For this test, there  
202 were four perches, one feeding dish, and one drinking trough in each part of the cage.

203

204 - Novel and familiar food tests:

205

206 Food colour is one major factor inducing neophobia in birds (Marples and Roper  
207 1996, Kelly and Marples 2004). Starlings are very sensitive to the colour blue, but this is  
208 not a common colour for their usual food (Hart et al. 1998). The novel food consisted of the  
209 usual pellets coloured blue using methylene blue (75g commercial food + 50 ml of water +  
210 5ml methylene blue) placed in the usual feeder in part II of the cage. The test lasted 15  
211 minutes.

212 The individuals were deprived of standard food 30 minutes before the experiment,  
213 in order to increase their food motivation.

214

215 One test was also performed using familiar food in order to establish individual  
216 responses to food: three mealworms were placed in the feeding dish in part II of the cage  
217 and the latencies to approach the feeding dish and eat mealworms were measured. This test

Rodriguez *et al.*

218 was conducted four days after the blue food test, and one day before the novel object test.

219

220 = Novel object test:

221 A novel object (a Petri dish wrapped in clear tape and attached to a white wood  
222 substrate) was placed in part II while the bird was in part I (closed). The barrier was then  
223 removed so that the bird could see and approach the object. The test lasted 15 minutes.

224 **Figure 1: Experimental design and chronology of the experiments conducted**  
225 **on the three groups of starlings**

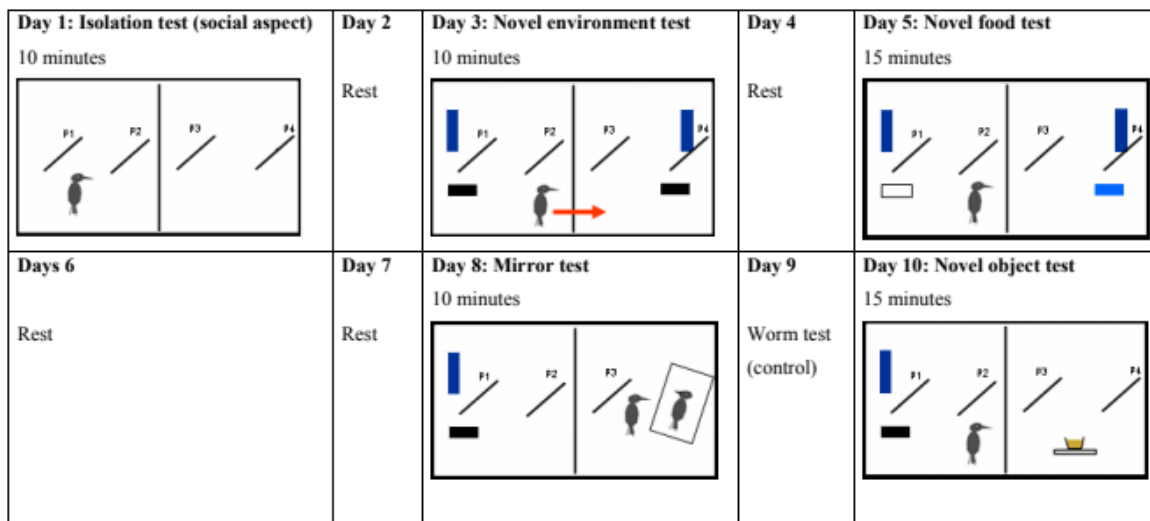

226

227 (The mirror test is the subject of another publication non presented here)

228

229 *Data analysis*

230

231 Behavioral data were analysed using continuous focal sampling (Altman 1974). The list of  
232 behaviors recorded is in Table 1.

233

234

235 **Table 1: Behaviors recorded during the isolation and neophobia tests**

236

|                              |           |                                                                |
|------------------------------|-----------|----------------------------------------------------------------|
| <b>Feeding</b>               | Eat       | The bird pecks at pellets in the feeding dish or on the ground |
|                              | Peck food | The bird pecks at food                                         |
|                              | Drink     | The bird drinks water from the drinking trough                 |
| <b>Maintenance behaviors</b> | Preen     | The birds preens itself                                        |
|                              | Scratch   | The bird scratches itself with its legs                        |



Rodriguez *et al.*

|                                        |                  |                                                                                    |
|----------------------------------------|------------------|------------------------------------------------------------------------------------|
|                                        | Shake            | The bird ruffles its feathers and shakes them                                      |
|                                        | Shake head       | The bird shakes its head                                                           |
|                                        | Rub beak         | The bird rubs its beak on a perch                                                  |
| <b>Exploration</b>                     | Peck G           | The birds pecks with the beak on the ground                                        |
| <b>Vocalizations</b>                   | Call             | The bird calls                                                                     |
|                                        | Sing             | The bird sings                                                                     |
| <b>Mobility</b>                        | Fly              | The bird flies in the cage from one perch to another or from the ground to a perch |
|                                        | Walk G           | The bird walks on the ground                                                       |
|                                        | Walk P           | The bird walks on a perch                                                          |
| <b>Visual attention</b>                | Observe (Obs)    | The bird scans in several directions without moving                                |
|                                        | Gaze at food     | The bird looks at food for more than 1s without moving                             |
|                                        | Gaze at object   | The bird looks at the new object for more than 1s without moving                   |
| <b>Interaction with the new object</b> | Touch the object | The bird touches the object                                                        |
| <b>Close the eyes</b>                  | Close eyes       | The bird closes its eyes and does not move                                         |

237

238 Temporal parameters were also measured such as the latency to enter part II in the  
239 novel environment tests, to peck at the novel food or to approach (less than 20 cm) or touch  
240 the novel object in the food and novel object tests respectively.

241 For the novel food test, the number of pecks at the food and the weight consumed  
242 were also measured (feeding dish weighed before and after the experiment).

243 For the novel object test, the number of times the bird touched the object with its  
244 body (with its legs or its beak) was also taken into account.

245

#### 246 Statistical analysis

247 We used Cox models implemented in R 2.8.1 software to compare the probability of  
248 approaching the new situations between the different groups, and to test for potential effects  
249 of sex and year of capture on these probabilities (Cox and Oakes, 1984).

250 As there were no effects of sex and year of capture on behavior, we grouped the  
251 data of males and females and of the different years of capture in each category (rural and  
252 urban young).

253 Given the sample size, normality was not ensured and non-parametric tests  
254 (Kruskal-Wallis and Mann-Whitney) were used to compare the groups of birds (Siegel  
255 1956).

256 Pearson R correlation coefficients were calculated to test for potential correlations between  
257 the different parameters measured.

*Rodriguez et al.*

258

259 Behavioral profiles:

260 For the first three tests, hierarchical ascendant classifications were performed using R 2.8.1  
261 software and the Ward method of clustering in order to group individuals with behavioral  
262 similarities and detect different behavioral profiles (Ward 1963).

263

264 For each test, the analysis was performed on the basis of specific measures:

265

266 - Isolation test, eight behaviors were recorded: Walk on the perch, Walk on the  
267 ground, Fly, Pecks on the ground, Vigilance, Call, Maintenance.

268 - Novel environment test, four were used : Walking on the ground and Flying, as  
269 well as the time required to enter the novel environment and Time spent in the  
270 novel environment. The maximum time was 600 seconds (the duration of the test).

271 - Novel food test, five behavioral parameters were used: frequencies of flying and  
272 gazing at the food, time to taste blue food, number of pecks at food, and quantity of  
273 consumed food. When the individuals did not taste the blue food, the value used for  
274 the latency was 900 seconds (the duration of the test).

275

276 Once we had obtained the different clusters for each experiment, we conducted  
277 Kruskal-Wallis and Mann-Whitney non-parametrical tests between the clusters in order to  
278 detect which behavioral items distinguished them.

279 Finally, we conducted Chi square tests on the number of birds from each group  
280 (rural, urban or migratory) in order to see if there were significant differences between the  
281 groups in the proportions of individuals presenting each profile.

282 For the novel object test, we compared the proportion of individuals that approached the  
283 object and the proportion of individuals that touched the object in each group.

284 Comparison of birds' reactions between situations

285

286 Pearson R coefficient tests were performed in order to test if there were correlations  
287 between latencies across the tests:

288 - to taste the blue food versus time to enter the novel environment

*Rodriguez et al.*

- 289 - to taste the blue food versus time to eat the first worm
- 290 - to eat the first worm versus time to enter the novel environment
- 291 - to approach the novel object versus time to enter the novel environment
- 292 - to approach the novel object versus time to taste the blue food

293

294 We conducted Kendall correlation tests in order to measure the degree of correspondence  
295 between behavioral ranks across the tests. For example, the individual ranks of the  
296 frequency of flying in the novel environment test were compared to the ranks of flying in  
297 the novel food test.

298

299 *Animal welfare note*

300

301 This study was conducted at the Ethos Laboratory at Rennes University approved by the  
302 French Committee for Animal Welfare and the French Ministry of Research, following the  
303 recommendations for taking care of and experimenting on Starlings. The European starling  
304 is an invasive non protected species. Furthermore the present study was based on  
305 behavioral observations and was strictly non invasive in physical terms.

306

## 307 **Results**

308

309 Behavioral responses

310 There was no effect of the year of capture, age or sex on the behavioral responses of the  
311 birds in the different tests (Cox analyses:  $1.13 < OR < 1.63$   $0.192 < p < 0.8$  OR=Odd Ratio)  
312 However clear differences appeared between the two groups of hand-raised birds in the  
313 novel environment test OR=2.5  $p=0.035$ ). Twice more urban birds entered the novel  
314 environment during the test than rural birds(Cox analysis, confidence interval = [1.07 ;  
315 5.85] (Figure 2).

316

317 There was a significant difference in the latency to enter the novel environment between  
318 the three groups (Kruskal Wallis test:  $H=10.45$ ,  $p=0.0055$ ) but none for the other latencies  
319 ( $p>0.05$ ).

Rodriguez *et al.*

320

321 The urban and migratory birds entered the novel environment more quickly than the rural  
322 birds ( $X_r = 176$ sec,  $X_u = 67$ sec,  $N_r = 19$ ,  $N_u = 13$ ,  $z = -2.19$ ,  $p = 0.03$ ,  $X_m = 57$ sec  $N_m = 12$   $z = -$   
323  $3.11$ ,  $p = 0.0019 < 0.017$ ) while there was no significant difference between the urban and  
324 migratory birds ( $z = -0.44$ ,  $p = 0.66$ ) (Figure 2).

325

326 The rural birds tended to touch the object later than the migratory birds ( $z = 1.53$ ,  $p = 0.051$ )  
327 ( $N_r = 19$ ,  $N_m = 12$ ,  $X_r = 532$ sec,  $X_m = 418$ sec).

328 **Figure 2 : Comparison of reactions to neophobia tests between the three groups**

329

330

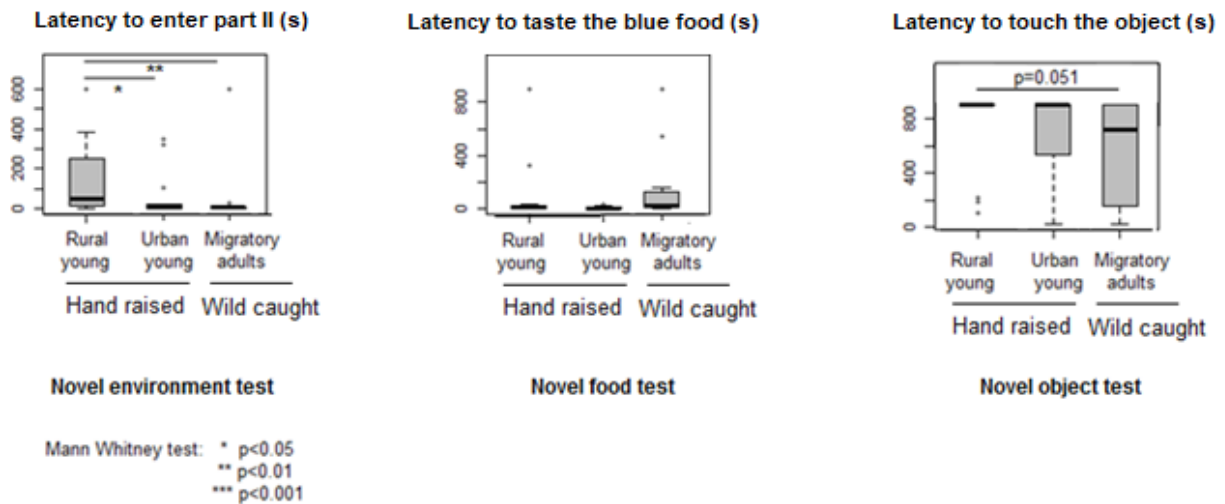

331

332

333 There was high interindividual variability in the latencies to enter part II (1 to 600 seconds)  
334 and in the time spent there (0 to 594 sec.), but both times were negatively correlated  
335 (Pearson test:  $R = 0.7$ ,  $df = 42$ ,  $p < 0.05$ ).

336 Similarly, there was a large diversity of reactions in the novel food test, latencies to  
337 peck at the blue food range from between 1 to > 900s as some individuals never tasted the  
338 food during the 15 minutes of the test.

339 The number of pecks to the food comprised between 0 and 187.

340 When we conducted Pearson tests, there was a negative correlation between the latency to  
341 taste the blue food and the number of pecks to it ( $R = 0.33$   $df = 42$   $p < 0.05$ ) indicating that the  
342 earlier the birds tasted it the more they subsequently ate, as also shown by the correlation

*Rodriguez et al.*

343 between the number of pecks at food and the weight consumed ( $R=0.61$   $df=42$   $p<0.01$ , 0 to  
344 3.03g).

345 Eighteen birds never approached the novel object while others did so within 3 seconds.  
346 There was no correlation between the latency to approach and the latency to touch the  
347 object ( $R=0.29$   $df=25$   $p>0.05$ ) nor between the number of contacts with the object and the  
348 latency to touch it ( $R=0.288$   $df=24$   $p>0.05$ ).

349

350 Behavioral profiles

351

352 *Social isolation test*

353 The hierarchical ascendant classification lead to the identification of two different  
354 behavioral profiles: a calm profile and an active profile (Figure 3). Individuals from the  
355 active profile were characterized by high levels of mobility and showed the following  
356 behaviors significantly more frequently: flying, walking on the perches, walking on the  
357 ground, pecking on the ground, observation and distress calls (Figure 4). The individuals in  
358 the calm group tended to show more maintenance behaviors.

359

360 **Figure 3: Clusters from the hierarchical ascendant analysis on isolation test (C=Rural,**  
361 **V=Urban, M=Migratory)**

Rodriguez et al.

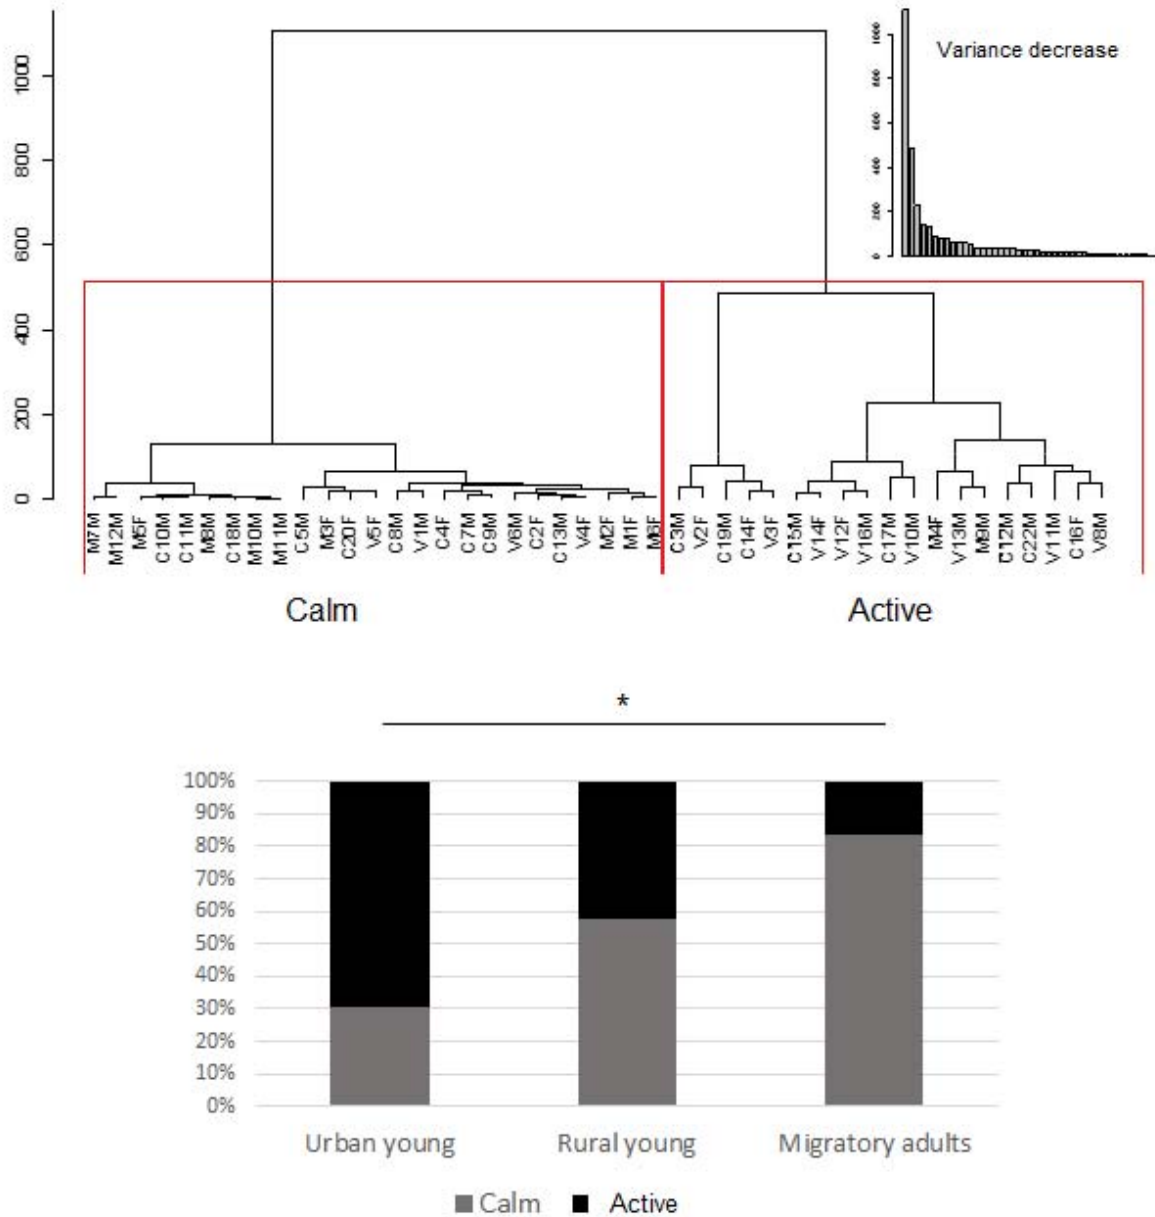

362

363

364

365 The frequencies of individuals in each group indicated that there were significantly more

366 active individuals in the urban young group than in the migratory adult group ( $\chi^2$  test:

367  $p < 0.05$ )

368

369 **Figure 4: Behaviors expressed by each cluster in the isolation test**

370

Rodriguez et al.

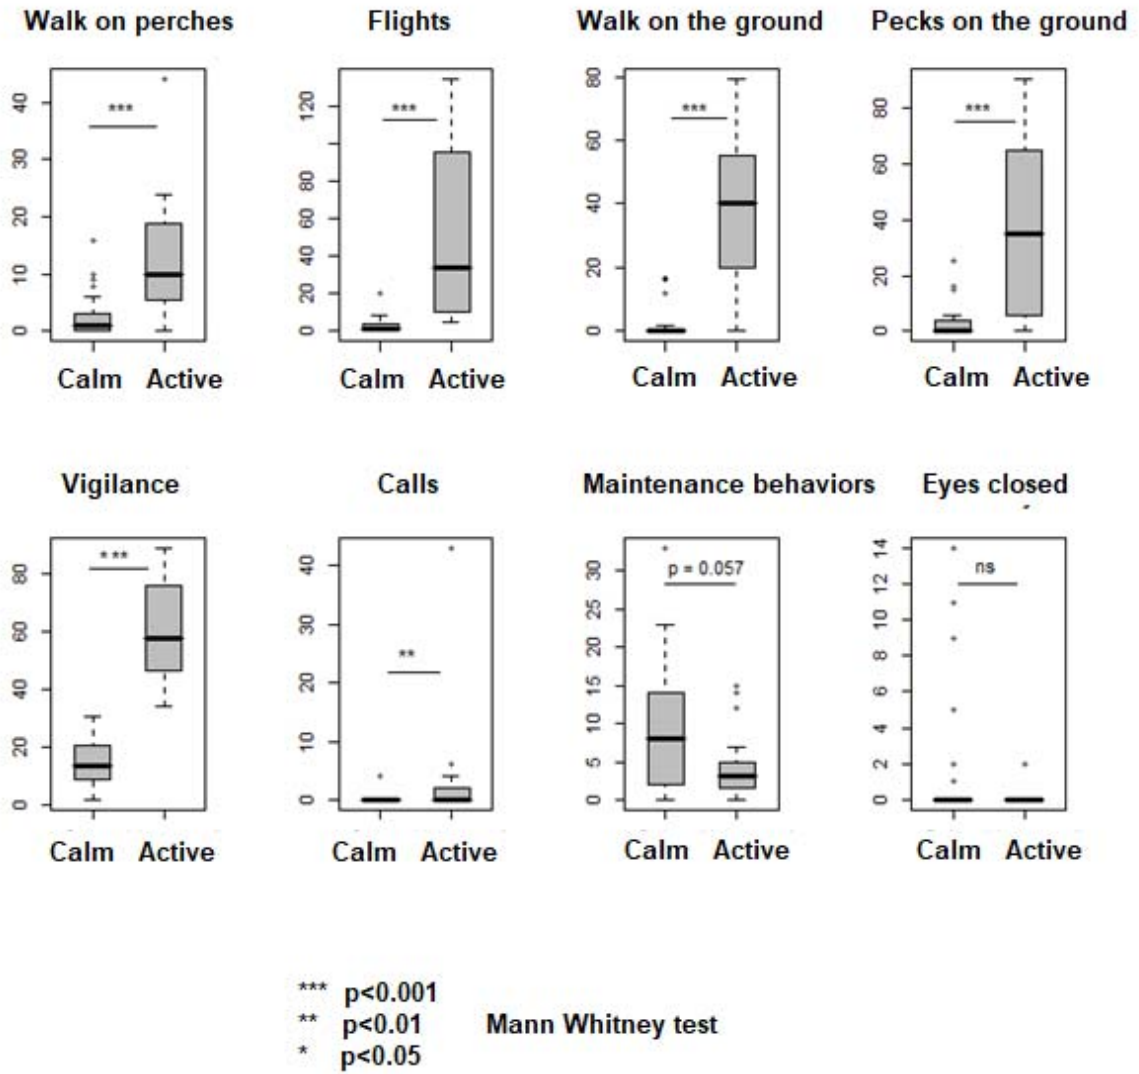

371

372

373

374 *Novel environment test*

375 The hierarchical ascendant classification allowed us to distinguish three different  
376 behavioral profiles (Figure 5): a shy profile, an intermediate profile and a bold one.

377 The bold and the intermediate profiles differed significantly from the shy profile in many  
378 ways: higher levels of mobility (walk and flights), and birds entered the novel environment  
379 while the shy individuals did not (Figure 6). Bold and intermediate individuals differed in  
380 the time they spent in the second part of the cage: the bold ones stayed more than half of

*Rodriguez et al.*

381 the time of the experiment in the second part of the cage, significantly longer than the  
382 intermediate ones that stayed less than 300 seconds in the novel environment.

383

384 **Figure 5: Clusters from the hierarchical ascendant analysis of the novel environment**

385 **test**



Rodriguez et al.

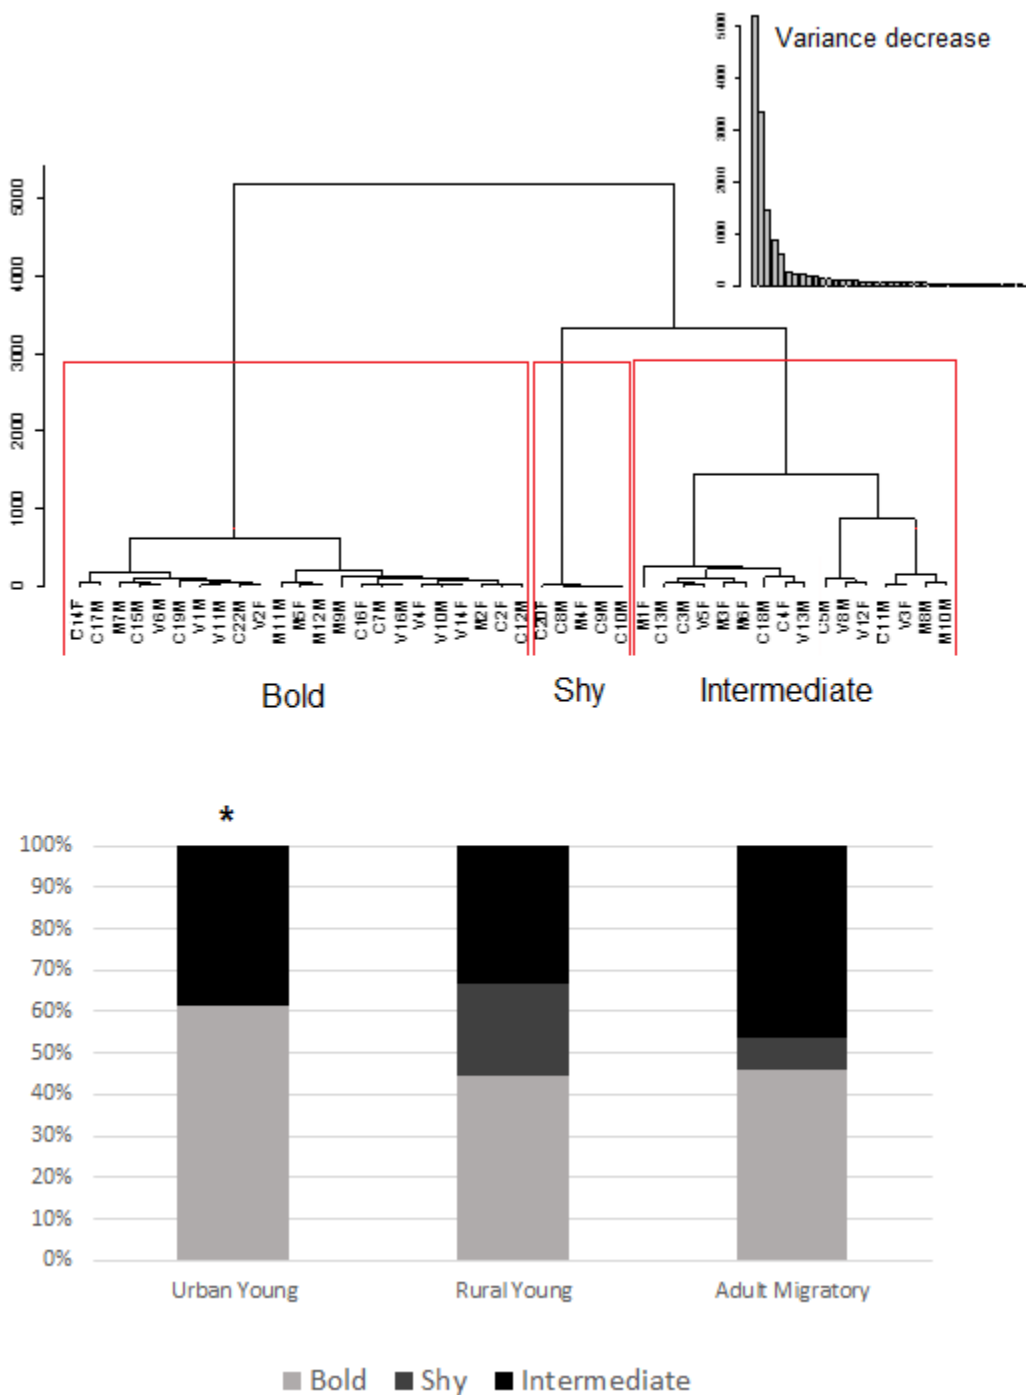

386  
387  
388  
389

**Figure 6: Behaviors expressed by each cluster in the novel environment test**

Rodriguez et al.

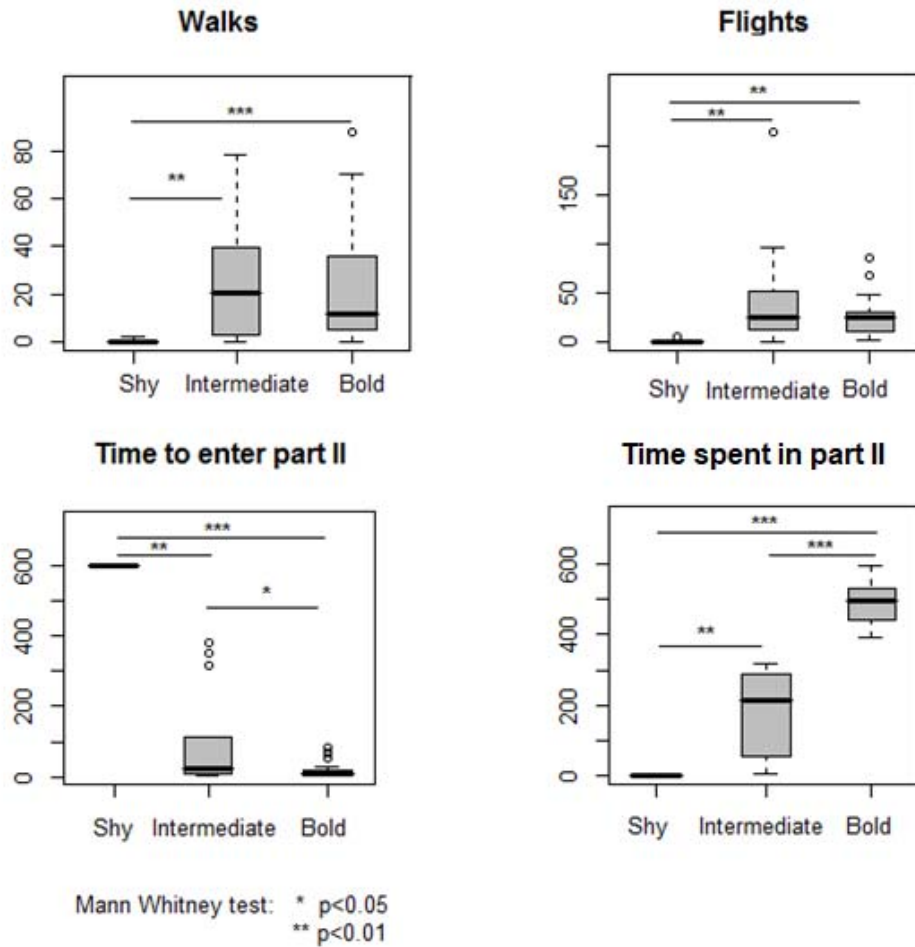

390

391

392

393 There were significantly more bold individuals than shy ones in the group of urban birds  
394 ( $X^2$  test :  $p=0.023$ ). The proportions of bold, intermediate and shy individuals were  
395 equivalent in rural and migratory groups ( $X^2$  test :  $p<0.05$ ).

396 *Novel food test*

397

398 Three different types of profiles appeared again: a bold, a shy and an intermediate profiles  
399 (Figure 7). The latency to taste the food was longer in the shy individuals (Figure 8). The  
400 bold birds pecked significantly more at the food and ate more of it than the intermediate  
401 birds (Figure 8). These two profiles ate more than the shy individuals who very rarely  
402 pecked at the food. The proportions of the different profiles did not differ between the three  
403 groups and nor within each group ( $\chi^2$  test:  $p > 0.05$ ).

404

Rodriguez et al.

405

406 **Figure 7: Clusters from the hierarchical ascendant analysis on novel food test**

407

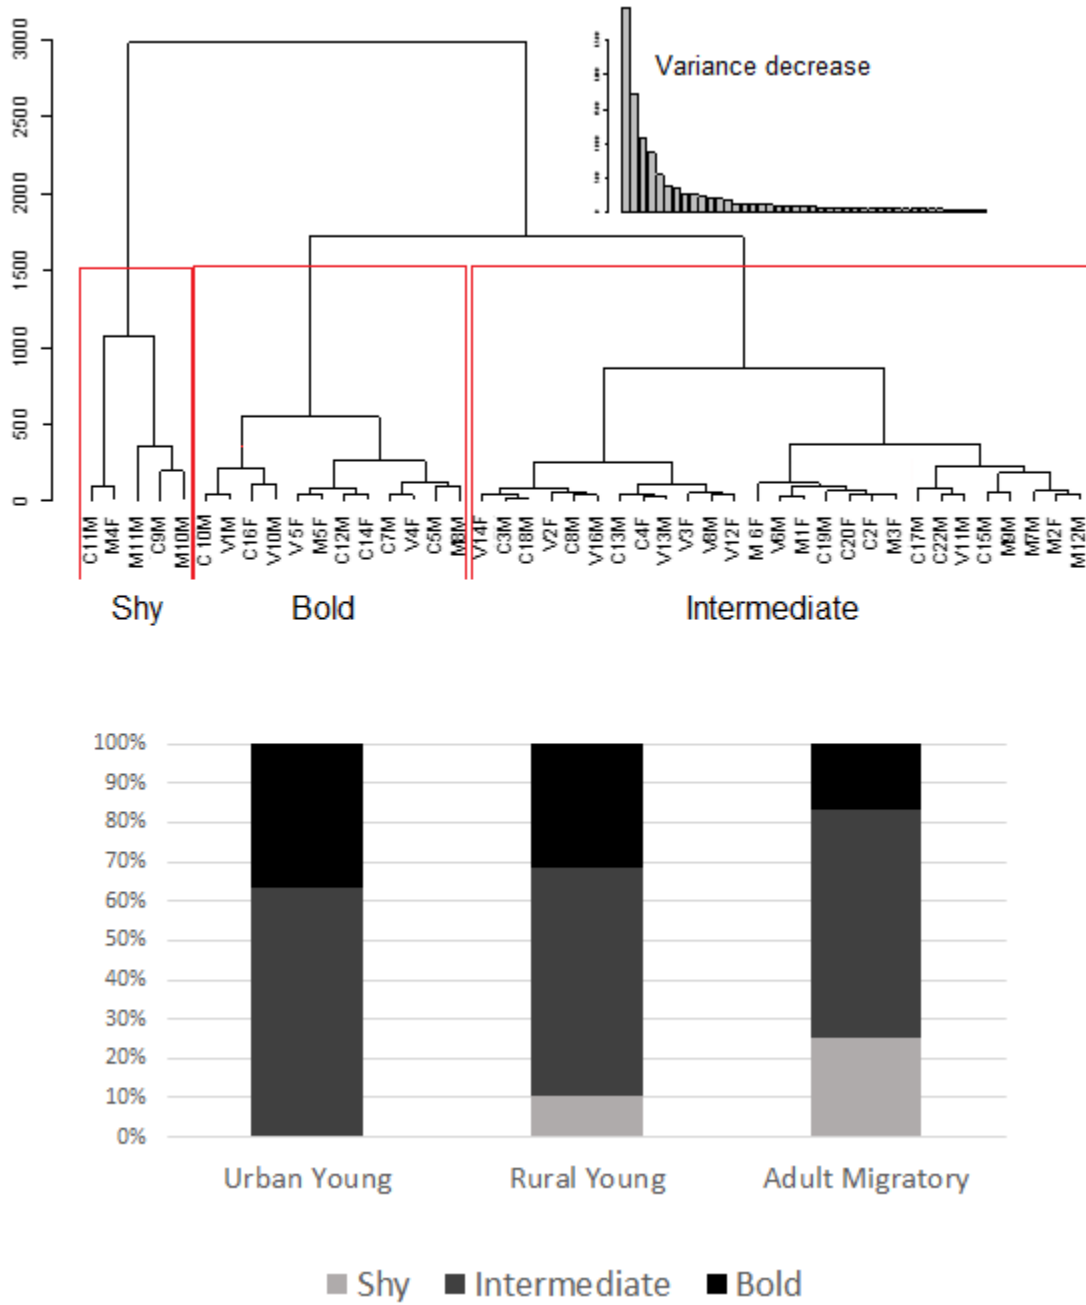

408

409

410

411

412

413

414

415

Rodriguez *et al.*

416 **Figure 8: Behaviors expressed by each cluster in the novel food test**

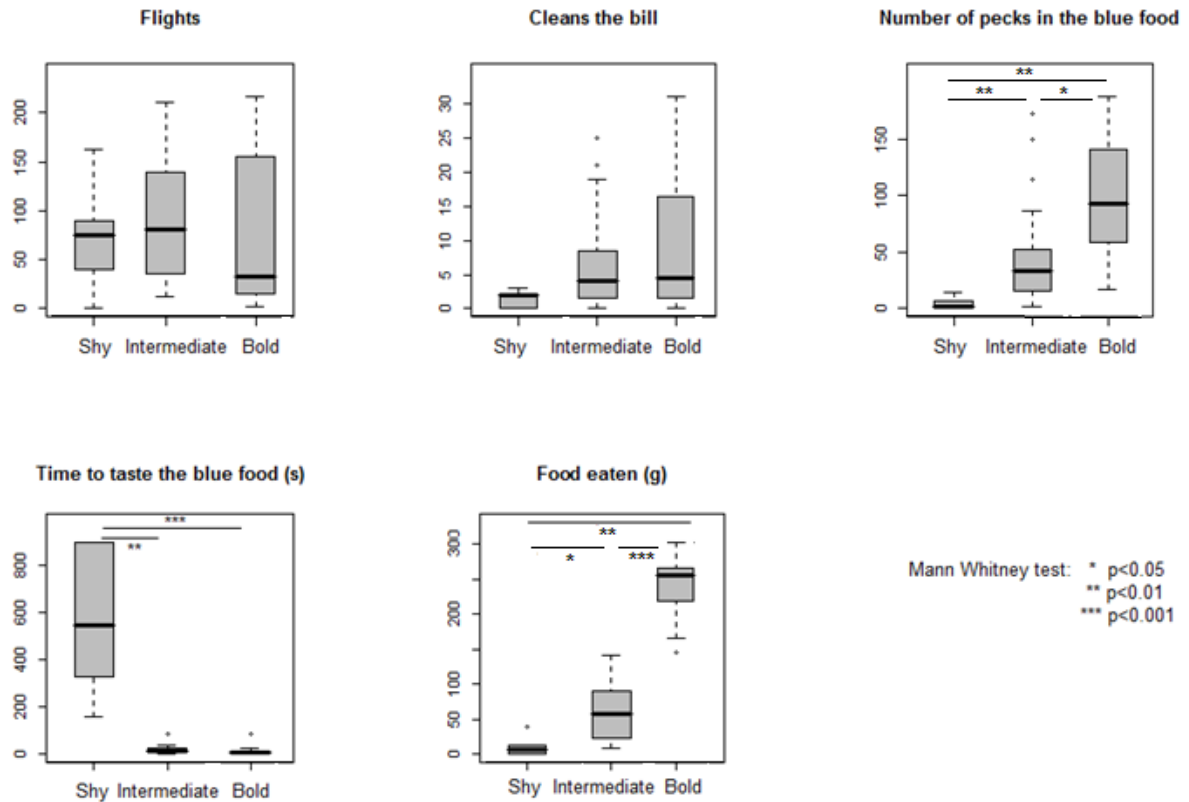

417  
418  
419

420 *Novel object test:*

421 As mentioned earlier, a large proportion of birds never approached or touched the object.  
422 The proportion of these clearly neophobic animals did not differ between groups  $p>0.05$  for  
423  $\chi^2$  tests.  
424 However, in the rural young group there were significantly more individuals that did not  
425 touch the object than individuals that did (Figure 9).

426  
427  
428

429 **Figure 9: Proportions of individuals that approached and that touched the object**

Rodriguez *et al.*

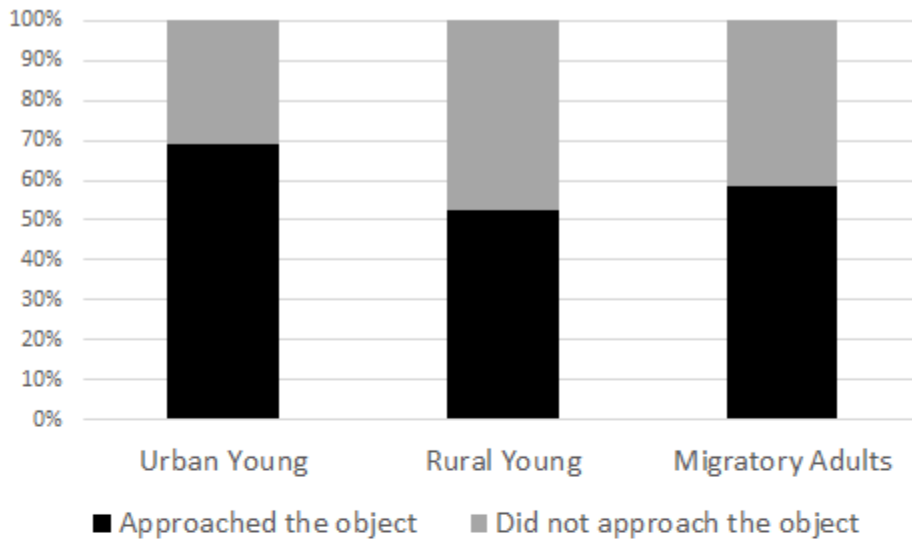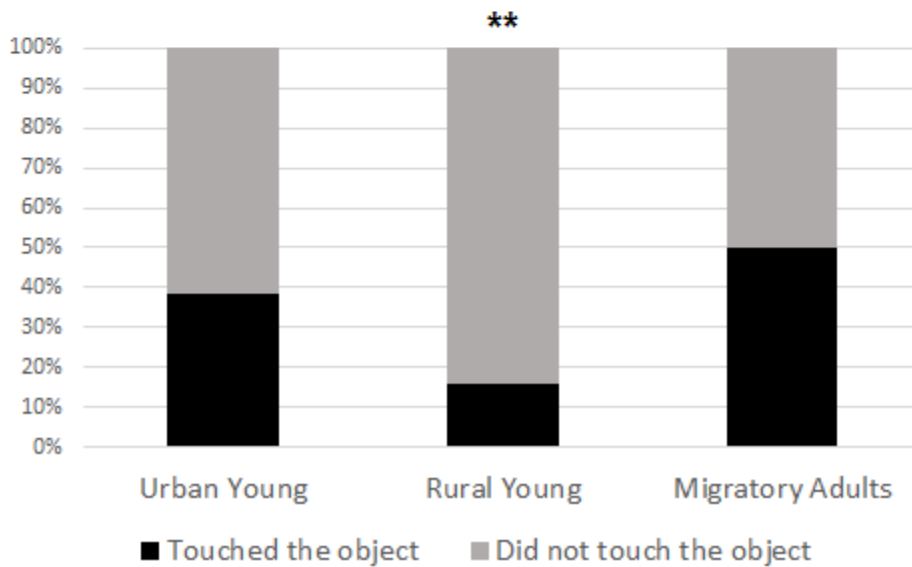

430

431

432 Correlations between tests:

433        There were no correlations between the latencies (to enter the second part of the

434 cage, to taste the blue food, to approach the object) observed in the three neophobia tests

435 (0.0057 < R < 0.29 df=42: p>0.05).

Rodriguez *et al.*

436 There was a significant positive correlation between the latency to test the blue food and  
437 the latency to eat the first worm ( $R=0.56$   $df=42$   $p<0.01$ ).

438

439 Correlations in behavioral ranks between tests:

440 Some behaviors were correlated between tests (Table 2):

- 441 - walks on perches, pecks on the ground and vigilance frequencies between the  
442 isolation and the novel environment tests
- 443 - frequencies of walking on the perch , flight , walking on the ground , observation ,  
444 calling; respectively between the isolation and the novel food tests (i.e. 5 out of 7  
445 behaviors measured), frequencies of walking, flying, observing and calling;  
446 respectively between the isolation and novel object tests
- 447 - the number of walks on the perches and the rank of visual attention; respectively  
448 between the novel environment and the novel food tests,
- 449 - the ranks for the number of walks, the number of times the birds fed and the ranks  
450 of vigilance frequency between the novel object and novel environment tests,
- 451 - the ranks of the number of walks on the perch , the ranks for visual attention  
452 (vigilance behaviors and gazing at the novel item, food or object) between the novel  
453 food and novel object tests.
- 454 - the ranks to eat food between the novel environment and the novel object tests,  
455 indicating that the birds ate similar quantities when the food had the same familiar  
456 aspect. However, the ranks to eat blue food were not correlated to the ranks to eat  
457 the normal non-coloured food indicating that the change of colour alters the usual  
458 levels of consumption of birds.

459

460

461

462 **Table 2: Consistencies in birds' behaviors between tests: p values for the correlation of**  
463 **ranks in the Kendal test**

464

---

**Compared behaviors**

**Tests**

---

Rodriguez *et al.*

|                                           | Isolation test /<br>Novel environment | Isolation /<br>Novel object test | Novel environment /<br>Novel object test |
|-------------------------------------------|---------------------------------------|----------------------------------|------------------------------------------|
| Walks on the perch                        | z=3.7 p=0.0002***                     | z=2.8 p=0.005**                  | ns                                       |
| Pecks on the ground                       | z=2.7 p=0.007**                       | ns                               | ns                                       |
| Vigilance frequencies                     | z=2.4 p=0.02*                         | z=4.34p<0.0001***                | z=3.9 p<0.0001***                        |
| Flights                                   | ns                                    | z=2.9 p=0.004**                  | ns                                       |
| Walking on the ground                     | ns                                    | z=2.05 p=0.04*                   | z=4.7p<0.0001***                         |
| Call frequencies                          | ns                                    | z=2.39 p=0.017*                  | ns                                       |
| Maintenance behaviors                     | ns                                    | ns                               | ns                                       |
| Eating behavior                           | -                                     | -                                | z=2.9 p=0.0039**                         |
|                                           | Isolation/<br>Novel food test         | Novel environment/<br>Novel food | Novel object/<br>Novel food              |
| Walks on the perches                      | z=2.6 p=0.009**                       | z=2.7 p=0.007**                  | z=2.8 p=0.005**                          |
| Flights                                   | z=2.5 p=0.013*                        | ns                               | ns                                       |
| Walks on the ground                       | z=2.5 p=0.013*                        | ns                               | ns                                       |
| Observation frequencies                   | z=3.1 p=0.0022**                      | z=2.6 p=0.009**                  | z=3.3 p=0.001***                         |
| Calling frequencies                       | z=3.2 p=0.0025**                      | ns                               | ns                                       |
| Pecks on the ground                       | ns                                    | ns                               | ns                                       |
| Maintenance behaviors                     | ns                                    | ns                               | ns                                       |
| Eating behavior                           | -                                     | ns                               | ns                                       |
| Gazing at the object / Gazing at the food |                                       |                                  | z=2.4 p=0.018**                          |

465

466

467

468

469 Modifications of behavioral responses between tests:

470 The comparison of the frequency of behaviors between the two tests with the same duration

471 (novel environment and novel object test) revealed that the birds performed more flights in

472 the novel object test than in the novel environment test, suggesting a higher level of fear

473 when they were faced with a new object (Wilcoxon test, N=44, z=-4.438; p<0.0001).

*Rodriguez et al.*

474 For the other behaviors, the differences were not significant ( $p > 0.5$  in all cases).

475

## 476 **Discussion**

477 This study, based on behavioral tests, reveals that different invasion histories of  
478 previous bird generations were reflected in personality differences in current generations:  
479 even when hand-raised and maintained together under similar conditions, starlings from a  
480 rural non-invasive population proved more reluctant to touch a novel object and to enter a  
481 novel environment than those from an urban invasive population. The comparison with  
482 migratory birds caught as adults revealed that they showed more similarities with the urban  
483 birds. Careful examination of individual behavioral profiles produced clear groups that  
484 could differ according to the trait tested. Thus, two profiles (calm/active) emerged in the  
485 social separation test, and three profiles (shy, intermediate and bold) in the novel  
486 environment and the novel food tests.

487 Some individual stability, as shown by correlations between tests, suggests that  
488 these were indeed individual stable behavioral differences.

489 The different populations differed in their representation within each personality  
490 cluster. Overall, the rural non-invasive birds appeared calmer in the social separation test  
491 but shyer in all neophobia tests than the urban invasive birds, even though they had shared  
492 the same developmental history (ontogeny). This probably indicates that behavioral traits  
493 that may have characterized their ancestors have been inherited and retained.

494 The migratory birds, caught as adults, appeared to have an intermediate profile, or  
495 even tended to be shyer, which may be partly explained by their quite different life history.

496

497 *Social profiles in an invasive bird*



Rodriguez *et al.*

498

499 In the isolation test, we observed two types of reaction (active and calm). The active  
500 individuals are probably more emotive and more stressed by social deprivation. Calm and  
501 active individuals were observed in all three groups. However, the urban group contained a  
502 higher proportion of active individuals in comparison to the migratory group.

503         These results match our observations in the field where we found that individuals  
504 from colonisation fronts are more readily attracted to decoys and to starling song playbacks  
505 (in particular in recently colonized urban areas) (Rodriguez *et al.* 2010a, Rodriguez *et al.*  
506 2020). These populations seem to comprise more individuals who actively seek social  
507 contact. Nevertheless, leaving a colony to settle in an unoccupied habitat may favour calm  
508 individuals that are tolerant of social isolation at colonization fronts. During field  
509 observations in southern Italy, one of the more recent propagation fronts of the species in  
510 Europe, we found one pair of starlings nesting alone in the rural area of Otranto  
511 (Rodriguez 2010b). This pair was five kilometres from the nearest other pairs during two  
512 consecutive years. Hausberger (1986, 1988) also observed isolated pairs breeding on the  
513 colonisation front of the Australian invasive population. Breeding in social isolation is thus  
514 not impossible for this usually gregarious species.

515         To our knowledge this is the first time that two types of reaction to social isolation  
516 have been described in an invasive species. We suggest that the existence of these two  
517 different strategies enables behavioral flexibility in situations with different population  
518 densities. Such flexibility has been demonstrated in the vocal communication of European  
519 starlings which differs according to population density (Henry *et al.* 2015). Similarly in  
520 yellow-bellied marmots (*Marmota flaviventris*) females that had affiliative interactions with  
521 more individuals, and those that were more socially embedded in their groups, were less

*Rodriguez et al.*

522 likely to disperse (Blumstein et al. 2009). Fogarty et al. (2011) found, by modeling invasive  
523 processes, that expansion occurs more rapidly when a species has a mix of life-history or  
524 personality types that differ in density-dependent performance and dispersal tendencies.  
525 They also found that polymorphism in sociability increases the rate of advance of the  
526 invasion front, since asocial individuals colonize empty patches and facilitate the local  
527 growth of social types that, in turn, induce faster dispersal of “asocial” individuals at the  
528 invasion edge. Our results are in agreement with this model as we found different kinds of  
529 reactions towards social isolation indicating a mix of personalities in the first test.

530

531

532 *Neophobia and exploration in invasive processes*

533 When individuals leave their habitat of origin during migration or when they settle in new  
534 habitats, they are likely to encounter new food items or novel objects. All groups (rural  
535 young, urban young and adult migratory) included some individuals who entered the novel  
536 environment rapidly, and stayed there for a long time apparently at ease, indicating  
537 occupying novel environments without expressions of stress is not restricted to one  
538 particular group.

539

540       The analysis of starling behavioral responses to neophobia revealed a high diversity  
541 of reactions towards novel situations in the species. These interindividual differences were  
542 observed both in latencies to approach novelty and in behavioral profiles indicating that the  
543 species contains a wide range of possible responses to cope with novel environments. We  
544 observed a continuum of responses from shy to bold reactions with intermediate levels of  
545 mobility and of latencies to approach novelty.

Rodriguez et al.

546

547 *Neophobia towards novel environments and consequences for dispersal*

548 The proportion of bold individuals was higher than the proportion of shy individuals in the  
549 urban young group. Both urban young and migratory adults entered the novel environment  
550 sooner than the rural young did.

551

552 We hypothesized that individuals at colonization fronts and migratory birds are less  
553 reluctant to explore novel habitats and we found some support for this hypothesis. More  
554 studies should be conducted in the field to verify if bold individuals disperse more.

555 At the intraspecific scale, a relationship between neophobia and dispersal has been  
556 observed in Great tits, *Parus major* (Digenmanse et al. 2003), and in a terrestrial tortoise,  
557 *Testudo hermanni* (Rodriguez et al. 2018). Individuals that appeared bold or very mobile in  
558 neophobia tests travelled greater distances than shy ones when released into the wild  
559 (Digenmanse et al. 2003 , Rodriguez et al. 2018). Moreover, Dingemanse et al. (2003)  
560 observed that great tits assessed as bold had offspring that dispersed further. They also  
561 found that immigrant individuals arriving in a new habitat explored novel environments  
562 more rapidly than locally born individuals in laboratory tests.

563 At the interspecific scale, Rehage and Sih (2004) had observed dispersal differences  
564 in latencies to leave the original pool and enter new pools in four fish species: *Gambusia*  
565 *holbrooki*, *Gambusia affinis*, *Gambusia geiseri* and *Gambusia hispaniolae*. The two  
566 invasive species showed lower latencies compared to two non-invasive species.

567 Low neophobia towards novel environments can thus probably enhance dispersal  
568 and invasion of new habitats but the limits of our experimental design cannot confirm this  
569 aspect.

*Rodriguez et al.*

570

571 *Neophobia towards novel food*

572

573 Individual differences in the consumption of novel food were also observed: some  
574 individuals did not taste the blue food, some individuals tasted it rapidly but did not eat it  
575 again or only a few times while others tasted it rapidly and consumed a lot of it. There  
576 were no differences between groups but each group contained bold individuals who took  
577 unfamiliar food early and ate large amounts of it.

578 Rennes city has been reported as a sub-optimal habitat for starlings, where finding  
579 sufficient food for nestlings is particularly difficult and higher rates of nestling mortality  
580 occur in this population than in the surrounding rural areas (Mennechez and Clergeau  
581 2006). Therefore, the inclusion of novel food items in their diet can be more important for  
582 urban than for rural populations in Brittany. Martin and Fitzgerald (2005) have observed  
583 that invading house sparrows on the propagation front approached and consumed novel  
584 food faster than individuals from areas where sparrows have been settled for a long time.

585 Here we observed neophilic birds in each group. The phenomenon of neophilia has  
586 been reported in many social species of birds, primates and rodents (Galef 1993, Visalbergi  
587 and Fragazi 1994, Cadieu et al. 1995, Wauters et al. 2002) where only a few bold  
588 individuals take the first step, and then others copy the choices made by bolder ones.  
589 Individuals who readily sample novel items and consume large quantities of novel food can  
590 expand their diet, whereas individuals who taste only small quantities may detect possible  
591 harmful items (Galef 1993). Finally, individuals that do not taste novel food can avoid the  
592 consumption of toxic items (Galef and Laland 2005).

593 In invasion processes, neophilic individuals are probably responsible for feeding

*Rodriguez et al.*

594 innovations. At the colonisation front in southern Italy we observed starlings feeding their  
595 chicks with olives and dates, two food items not consumed by older established populations  
596 in northern Italy and Europe. Feeding young with novel food may serve to introduce food  
597 innovations into the diet of invasive populations.

598

599 *Neophobia towards novel objects*

600

601 Starlings seemed more reluctant to approach novel objects than the new  
602 environment or the new food, probably because it is a more artificial (less usual) situation  
603 in natural conditions. They appeared to be more fearful as they flew more often in this test.

604 Nevertheless, half of the individuals of each group approached the object (even in  
605 the absence of a food motivation).

606 Significantly more individuals did not touch the object in the rural young group. In  
607 the urban group and the migratory group, half of the individuals were shy while the others  
608 behaved in a bolder way and touched the object.

609 The higher proportion of individuals who touched the object in urban and migratory  
610 group is probably due to a longer history of populations encountering novel objects on  
611 migration and in urban contexts. Such individuals would probably touch and manipulate  
612 objects more readily in the wild. However, observations of free-living birds are needed, as  
613 the restrained situation in captivity obliges birds to be near objects that they could ignore in  
614 the wild (Greenberg 2003).

615 Echeverria et al (2006) have observed that when exposed to novel objects close to  
616 feeders, birds from various urban and non-urban species expressed neophobic behavior  
617 were reluctant to approach. Only the Chalk-browed Mockingbird *Mimus saturninus*

*Rodriguez et al.*

618 expressed a neophilic response towards the novel objects. The authors made their  
619 observations in suburban areas with few novel objects. They suggested that urban birds  
620 could have become less neophobic by the experience of frequent encounters with novel  
621 objects. Lower levels of neophobia were reported in migratory garden warbler, *Sylvia*  
622 *borin* , when compared to resident Sardinian warblers, *Sylvia melanocephala momus* (a  
623 non-migratory species) (Mettke-Hofmann et al. 2005). We compared different populations  
624 from a species containing both migratory and sedentary individuals, and found a mix of  
625 both neophilic and neophobic individuals in the different groups with predominantly  
626 neophobic individuals in the sedentary rural group. In a study conducted by Candler and  
627 Bernal (2015), differences of boldness were observed in cane toads where individuals from  
628 native populations did not approach a novel object while more than half of the individuals  
629 from introduced populations did. It has also been reported that early experience with novel  
630 objects in laboratory environments can result in low neophobia levels in young hand reared  
631 parrots *Amazona amazonica* compared with individuals raised by their parents in simple  
632 nest box environments with a lower diversity of objects (Fox and Millam 2004). However,  
633 when faced with predator-like images, European starlings hand-reared in the laboratory  
634 appeared more reactive than birds wild-caught as adults (Belin et al. 2018). Moreover, there  
635 were both differences between our migratory birds and both hand-raised groups and  
636 similarities between the migratory wild-caught birds in some respects and the urban hand-  
637 reared birds in other respects. Early experience with an “enriched” environment therefore  
638 cannot be the sole explanation.

639

640 *Possible determinism of personality differences*

641 Differences in personality between starlings may be due to genetic or environmental

*Rodriguez et al.*

642 causes. For example, for the migratory group wild-caught as adults, migration experience  
643 may play a role and for the hand-reared birds, developmental experience may have an  
644 influence on behavior.

645 We can imagine scenarios in which successive selection of bold individuals can operate  
646 (that means that genetically and physiologically conditioned individuals are selected in  
647 colonization fronts by natural processes) in the same way as selection for calm individuals  
648 operates in domestication processes (Belyaev 1978). Early parental effects can also play a  
649 role. In the quail *Coturnix coturnix*, chicks raised by experienced females are less fearful  
650 than those raised by naïve breeders. The less fearful chicks are quicker to explore an area  
651 containing a novel object (Pittet et al. 2013).

652 Female quails submitted to a stress condition lay eggs that contain higher levels of yolk  
653 testosterone and their chicks are more fearful in the novel environment test than chicks  
654 from females who were not stressed (Guibert et al. 2011).

655 *Behavioral syndromes in Starlings?*

656         The ranking of flight behavior, visual attention, calling and walking frequencies  
657 were positively correlated between the tests, indicating that individual differences are  
658 maintained in different novel contexts. Lee and Tang-Martinez (2009) found that in prairie  
659 voles the latencies to approach novelty were correlated between experiments involving the  
660 same kind of novelty but not between contexts involving really different situations. In  
661 horses, whereas there is a correlation between assessments of emotional reactions in similar  
662 situations (e.g. social isolation), no correlation was found between different tests (novel  
663 object/ novel obstacle), which reflected different interplays between genetic and  
664 environmental factors (Le Scolan et al 1997, Hausberger et al 2004). The individual stability  
665 in the reaction types observed here probably reflects behavioral syndromes. It would be

*Rodriguez et al.*

666 interesting to conduct physiological analyses to compare bold and shy individuals in  
667 different situations.

668 *Similarity between sexes*

669 We did not observe differences between sexes in latencies to approach the novel  
670 situations in any of the three neophobia tests. These observations are in agreement with the  
671 results of studies conducted in other species like cats and great tits (Durr and Smith 1997,  
672 Van Oers et al. 2004b), but differed from other studies. Jones (1977b, 1982, 1986) observed  
673 that female chicks fed significantly sooner, longer and more than males when presented  
674 with novel blue food and that females showed less behavioral inhibition when placed in a  
675 novel environment or in an open field. In the same way, female rodents seem to explore a  
676 novel environment sooner than males (Gray 1971). In other mammals like primates females  
677 may be more fearful than males, whereas there are no sex difference in horses (Buirski et  
678 al. 1978, Crepeau and Newman 1991, Hausberger et al 2004).

679 The absence of differences between sexes means that both females and males can  
680 explore novel environments, foods and objects, and that they can both adapt to novel  
681 conditions at colonisation fronts.

682

683 *Perspectives*

684 In a study on the Iberian wall lizard, *Podarcis hispanica*, Rodriguez-Prieto et al.  
685 (2011) conducted a novel environment test and found individual differences in boldness. In  
686 repeated tests, they observed that there were consistent personalities in individuals, but also  
687 a habituation phenomenon. Individuals that were bolder habituated faster to the apparatus  
688 than shyer ones (Rodriguez-Prieto et al. 2011). Thus, habituation processes should also be  
689 studied in invasive species to see if the primary fear reactions of individuals who did not



Rodriguez *et al.*

690 approach the object would be maintained in the long term or if experience enhances  
691 progressive colonization with a decrease of neophobia and emotional reactions. In another  
692 series of experiments, we observed that starlings rapidly habituate to the novel objects and  
693 can even learn to manipulate them in order to obtain food (Rodriguez 2010b). It is also  
694 important to understand what levels of boldness are adaptive and when boldness becomes  
695 costly: the bold Namibian rock agamas, *Agama planiceps* are reported to be more easily  
696 trapped than the shy ones (Carter et al. 2012,) and unreactive birds are hit by cars more  
697 often (Møller and Erritzøe 2017)

698         The presence of conspecifics can enhance or inhibit approaching and touching  
699 objects (Stöwe et al. 2006). Social aspects involved in neophobia need to be studied in  
700 order to better understand novelty-approaching dynamics in highly gregarious species like  
701 this one.

702

703

## 704 **Conclusion**

705         Introductions of starlings in different countries involved groups of 60 to 100  
706 individuals (Flux and Flux 1981, Feare 1984). The European starling, *Sturnus vulgaris* has  
707 successfully established self-sustaining populations in several of the regions where it has  
708 been introduced in North America, Australia, South Africa, New Zealand and Argentina  
709 (Pell and Tidemann 1997, Peris et al. 2005). We suggest that the diversity of reactions  
710 towards novelty, the presence of bold individuals in the groups, combined with social  
711 facilitation, enhanced the colonization processes allowing for the exploration of novel  
712 habitats, the consumption of novel foods and approaching novel objects (in particular in  
713 urban environments). The European starling did not invade habitats like forests and desert

*Rodriguez et al.*

714 regions. We think that in these cases landscape structure is involved as starlings need a  
715 combination of trees to nest and open field areas to forage and escape from predators. More  
716 studies in the laboratory and in the field are required to understand which of the different  
717 existing profiles retard or accelerate invasion success.

718 Ethical Statement should be divided into the following sub-section:  
719 - Funding  
720 - Conflict of Interest  
721 - Ethical approval  
722 - Informed consent

723

724

725

## 726 **Ethical Statement**

727 This study was supported by the Ministry of French Research by an Excellence Grant  
728 allocated for Doctor Alexandra Rodriguez (Bourse MRT) and by the laboratories of  
729 Ecology and Ethology Research INRA Scribe (ancient team of Ecology of Invasions) and  
730 CNRS UMR 6552 Ethos (Ethologie Animale et Humaine). The study takes into account  
731 ecology and socio-biology debates and postures around invasions biology. We used enough  
732 starlings to be able to conduct non parametrical tests and the maximum-minimum of birds  
733 required to fulfil the three Rs principle. This manuscript has been written, corrected and  
734 approved by its authors.

735

## 736 **References**

Adret-Hausberger, M (1986) Temporal dynamics of dialects in the whistled songs of starlings. *Ethol* 71: 140- 152

Rodriguez et al.

Adret-Hausberger, M (1988) Song differentiation and population structure. The example of the whistled songs in an introduced population of European starlings *Sturnus vulgaris* in Australia. *Ethol* 79:104–115

- 737 Altmann, J (1974) Observational study of behavior sampling methods. *Behav* 49 (3-4):  
738 227-267  
739
- 740 Aplin LM, Farine DR, Morand-Ferron J, Sheldon BC (2012) Social networks predict patch  
741 discovery in a wild population of songbirds. *Proc R Soc B-Biol Sci* 279 (4): 199–205  
742  
743
- 744 Aplin LM, Farine DR, Morand-Ferron J, Cole EF, Cockburn A, Sheldon BC (2013)  
745 Individual personalities predict social behavior in wild networks of great tits (*Parus major*)  
746 *Ecol Lett* 16:1365-1372  
747  
748
- 749 Atwell J, Cardoso C, Whittaker D, Campbell-Nelson S, Robertson K., Ketterson E (2012)  
750 Boldness behavior and stress physiology in a novel urban environment suggest rapid  
751 correlated evolutionary adaptation. *Behav Ecol* 23(5): 960–969  
752
- 753 Belin L, Formanek L, Heyraud C, Hausberger M, Henry L. (2018) Influence of early  
754 experience on processing 2D threatening pictures by European starlings (*Sturnus vulgaris*)  
755 *Anim Cog* <https://doi.org/10.1007/s10071-018-1207-x>  
756  
757
- 758 Blumstein DT, Wey TW, Tang K (2009) A test of the social cohesion hypothesis, interactive  
759 female marmots remain at home. *Proc R Soc B* 276: 3007–3012  
760
- 761 Buirski P, Plutchik R, Kellerman H (1978) Sex differences, dominance, and personality in  
762 the chimpanzee. *Anim Behav* 26: 123-129  
763
- 764 Belyaev, DK (1978) Destabilizing selection as a factor in domestication The Wilhelmine E  
765 Key Invitational . Lecture. *J Hered*, 70 (5): 301-308  
766
- 767 Cadieu JC, Cadieu N, Lauga J (1995) Local enhancement and seed choice in the juvenile  
768 canary, *Serinus canaries*. *Anim Behav* 50: 793-800  
769
- 770 Candler S, Bernal X (2015) Differences in neophobia between cane toads from introduced  
771 and native populations. *Behav Ecol* 26: 97-104  
772
- 773 Carter J, Heinsohn R, Goldizen A, Biro P (2012) Boldness, trappability and sampling bias  
774 in wild lizards. *Anim Behav* 83 (4): 1051-1058  
775

Rodriguez et al.

- 776 Coleman K, Wilson DS (1998) Shyness and boldness in pumpkinseed sunfish, individual  
777 differences are context-specific. *Anim Behav* 56: 927-936  
778
- 779 Cox DR, Oakes D (1984) *Analysis of survival data*. London, Chapman and Hall.  
780
- 781 Crane AL, Brown GE, Chivers DP, Ferrari MC (2020) An ecological framework of  
782 neophobia: from cells to organisms to populations. *Biol Rev* 95 (1): 218-231  
783
- 784 Craig A. (2020). Common Starling (*Sturnus vulgaris* Linnaeus, 1758). In: Downs, C:T: and  
785 Hart, L.A. (eds) *Invasive Birds: Global Trends and Impacts*. CAB International,  
786 Wallingford, UK, pp. 9-24.  
787
- 788 Crepeau LJ, Newman JD (1991) Gender differences in reactivity of adult squirrel monkeys  
789 to short-term environmental challenges. *Neurosc Behav Rev* 50: 61-65  
790
- 791 Dall S, Houston AI, Mc Namara J (2004) The behavioural ecology of personality,  
792 consistent individual differences from an adaptive perspective. *Ecol Lett* 7: 734-739  
793
- 794 Dingemanse N, Both C, Drent P, Van Oers KA, Van Noordwijk A (2002) Repeatability and  
795 heritability of exploratory behaviour in great tits from the wild. *Anim Behav* 64: 929-938  
796
- 797 Dingemanse N, Both C, Van Noordwijk A, Rutten A, Drent P (2003) Natal dispersal and  
798 personalities in Great tits. *Proc R Soc B* 270: 741-747  
799
- 800 Dingemanse N, Réale D (2005) Natural selection and animal personality. *Behav* 142: 1165-  
801 1190  
802
- 803 Durr R, Smith C (1997) Individual differences and their relation to social structure in  
804 domestic cats. *J Comp Psy* 4: 412-418  
805
- 806 Echeverria AI, Vasallo AI, Isacch JP (2006) Experimental analysis of novelty responses in a  
807 bird assemblage inhabiting in suburban marsh. *Can J Zool* 84: 974-980  
808
- 809 Elton CS (1958) *The ecology of invasions by animals and plants*. London, Methuen  
810
- 811 Faure JM, Arnould C, Beaumont C, Guémené D, Leterrier C, Mills AD, Richard S (2006)  
812 Consequences of selection for fear in Japanese quail. *Arch Geflügelk*, 70 (5): 216-222  
813
- 814 Feare C (1984) *The Starling*. Oxford, Oxford University Press  
815
- 816 Flux JE, Flux MM (1981) Population dynamics and age structure of Starlings (*Sturnus*  
817 *vulgaris*) in New Zealand. *New Zland. J Ecol* 4: 65-72  
818
- 819 Forgarty S, Cote J, Sih A (2011) Social personality polymorphism and the spread of  
820 invasive species, a model. *Am Nat* 177 (3): 273-287  
821
- 822 Fox RA, Millam R (2004) The effect of early environment on neophobia in orange-winged

Rodriguez *et al.*

- 823 Amazon parrots (*Amazona amazonica*). *App Anim Behav Sci* 89: 117-129  
824
- 825 Fox RA, Millam JR (2007) Novelty and individual differences influence neophobia in  
826 orange-winged Amazon parrots (*Amazona amazonica*). *App Anim Behav Sci* 104: 107-115  
827
- 828 Galef BG (1993) Functions of learning about food, a casual analysis of effects of diet  
829 novelty  
830 on preference transmission. *Anim Behav* 46: 247-265  
831
- 832 Galef BG, Laland KN (2005) Social learning in animals, empirical studies and theoretical  
833 models?. *Mod Biosc* 55: 489-499  
834
- 835 Gray JA (1971) Sex differences in emotional behaviour in mammals including man,  
836 endocrine bases. *Acta Psycho* 35: 29-46  
837
- 838 Greenberg R (2003) The role of neophobia and neophilia in the development of innovative  
839 behaviour of birds. In *Animal innovation*. Oxford University Press Ed Simon Reader and  
840 Kevin Laland p 344  
841
- 842 Gosling SD (2001) From mice to men, What can we learn about personality from animal  
843 research?. *Psycho Bull* 127: 45-86  
844
- 845 Groothuis TG, Carere C (2005) Avian personalities, characterization and epigenesis  
846 *Neurosci Biobehav Rev* 29: 137-150  
847
- 848 Guibert F, Lumineau S, Richard M, Kotrschal K (2011) Unpredictable mild stressors on  
849 laying females influence the composition of Japanese quail eggs and offspring's phenotype.  
850 *App Anim Behav Sci* 132 (1): 51-60
- Hall CS, Lindzey G, Campbell JB (1997) *Theories of personality*. (4th Ed) Canada, Wiley  
Publishers.
- 851
- 852 Hart NS, Partridge JC, Cuthill IC (1998) Visual pigments, oil droplets and  
853 cone photoreceptor distribution in the European starling (*Sturnus vulgaris*). *J Exp Biol* 9:  
854 1433-1446  
855
- 856 Hausberger M, Bruderer C, Le Scolan N, Pierre JS (2004) Interplay between environmental  
857 and genetic factors in temperament/personality traits in horses (*Equus caballus*) *J Comp*  
858 *Psy* 4: 434-446  
859
- 860 Henry L, Craig A, Lemasson A, Hausberger M (2015) Social coordination in animal vocal  
861 interactions : is there any evidence of turn taking ? The starling as an animal model. *Front*  
862 *Psy* 6:1416-(DOI : 103389/fpsyg201501416)  
863
- 864
- 865 Jones, BR (1977a) Repeated exposure of the domestic chick to a novel environment, effects

Rodriguez *et al.*

- 866 on behavioral responses. Behav Proc 2: 163-173  
867
- 868 Jones, BR (1977b) Sex and strain differences in the open-field responses of the domestic  
869 chick. App Anim Ethol 3: 255-261  
870
- 871 Jones, BR (1982) Effects of early environmental enrichment upon open-field behaviour and  
872 timidity in the domestic chick. Dev Psychobiol 15: 105-111  
873
- 874 Jones, BR (1986) Responses of domestic chicks to novel food as a function of sex, strain  
875 and  
876 previous experience. Behav Proc: 261-271  
877
- 878 Kelly D, Marples N (2004) The effects of novel odour and colour cues on food acceptance  
879 by the zebra finch, *Taeniopygia guttata* Anim Behav 68: 1049-1054
- 880 Kolbe JJ, Glor RE, Rodríguez Schettino L, Chamizo Lara A, Larson A Losos, JB (2004)  
881 Genetic variation increases during biological invasion by a Cuban lizard. Nature 431: 177-  
882 181  
883  
884
- 885 Le Scolan N, Hausberger M, Wolff A (1997) Stability over situations in temperamental  
886 traits of horses as revealed by experimental and scoring approaches. Behav Proc 41: 257-  
887 266  
888
- 889 Long JL (1981) Introduced birds of the world. Universe Books, New York 330 p  
890
- 891 Marples N, Roper T (1996) Effects of novel colour and smell on the response of naive  
892 chicks towards food and water. Anim Behav 51: 1417-1424  
893
- 894 Martin LB, Fitzgerald L (2005) A taste for novelty in invading house sparrows, *Passer*  
895 *domesticus*. Behav Ecol 16: 702-707  
896
- 897 Mennechez G, Clergeau P (2006) Effect of urbanisation on habitat generalists, starlings not  
898 so flexible? Acta Oecol 30: 182-191  
899
- 900 Mettke-Hofmann C, Ebert C, Schmidt T, Steiger S, Stieb S (2005) Personality traits in  
901 resident and migratory warbler species. Behav 142: 1357-1375  
902
- 903 Møller A, Erritzøe J (2017) Brain size in birds is related to traffic accidents. R Soc Open  
904 Sci 4 (3): 161040  
905
- 906 Neff BD (2003) Decisions about parental care in response to perceived paternity. Nature  
907 416: 716-719  
908
- 909 Neff BD, Sherman PW (2004) Behavioural syndromes versus Darwinian algorithms.  
910 Trends in Ecol Evol 19: 621-622  
911

Rodriguez et al.

- 912 Pascal M, Lorvelec O, Vigne JD, Keith , Clergeau, P (2003) Évolution holocène de la faune  
913 de Vertébrés de France, invasions et disparitions Paris, France 381 p  
914
- 915 Pell AS, Tidemann CR (1997) The impact of two exotic hollow-nesting birds on two  
916 native parrots in savannah and woodland in eastern Australia. *Biol Cons* 79:  
917 145-153
- 918 Peris S, Soave G, Camperi A, Darrieu C, Aramburu R (2005) Range expansion of the  
919 European starling *Sturnus vulgaris* in Argentina. Expansion del Estornino pinto *Sturnus*  
920 *vulgaris* en Argentina. *Ardeola* 52 359-364
- 921 Pfennig DW, Reeve HK, Sherman (1993) Kin recognition and cannibalism in spade foot  
922 toad tadpoles. *Anim Behav* 46: 87-94  
923
- 924 Phillips BL, Suarez AV (2012) The role of behavioural variation in the invasion of new  
925 areas. pp 190-200 Chapter 14. in Behavioural responses to a changing world, mechanisms  
926 and consequences Canolin, U & BM Wong Eds Oxford University Press  
927
- 928 Pittet F, Coignard M, Houdelier C, Richard-Yris MA, Lumineau, S (2013) Effects of  
929 maternal experience on fearfulness and maternal behaviour in a precocial bird. *Anim Behav*  
930 85 (4): 797-805  
931
- 932 Rehage JS, Sih, A (2004) Dispersal behavior, boldness, and the link to invasiveness,  
933 a comparison of four *Gambusia* species. *Biol Inv* 6: 379-391  
934
- 935 Rejmanek M, Richardson DM (1996) What attributes make some plant species more  
936 invasive? *Ecol* 77: 1655-166  
937
- 938 Richard MA (1826) L'étourneau In Oeuvres de Buffon. (Ed) F Baudouin Paris  
939
- 940 Rodríguez A, Clergeau P, Hausberger M (2010a) Flexibility in the use of social information  
941 in the successful *Sturnus vulgaris*, experiments with decoys in different populations. *Anim*  
942 *Behav* 80: 965-973  
943
- 944
- 945 Rodríguez A, Caron S, Ballouard JM (2018) Bold and shy, differences in explorative  
946 behavior and dispersal in *Testudo hermanni* V° Colombian Zoological Congress 5-7  
947 december  
948
- 949 Rodríguez A, Hausberger M, Henry L, Clergeau P (subm.) Social information and  
950 biological invasions, chorus songs are more attractive to European starlings in more  
951 recently established populations Submitted  
952
- 953
- 954 Rodríguez-Prieto I, Martín J, Fernández-Juricic E (2011) Individual variation in behavioural  
955 plasticity, direct and indirect effects of boldness, exploration and sociability on habituation to  
956 predators in lizards. *Proc R Soc Lon* 278: 266-273

Rodriguez et al.

- 957  
958 Sax D, Brown J (2000) The paradox of invasion. *Glo Ecol Biog* 9: 363-371  
959  
960 Siegel, S (1956) *Nonparametric statistics for the behavioral sciences* New York, NY, US,  
961 McGraw-Hill  
962  
963 Sih A, Kats LB, Maurer EF (2003) Behavioural correlations across situations and the  
964 evolution of antipredator behaviour in a sunfish–salamander system *Anim Behav* 65: 29–  
965 44  
966  
967 Sih A, Bell A, Johnson JC (2004) Behavioural syndromes, an ecological and evolutionary  
968 overview. *Trends Ecol Evol* 19: 372-378  
969  
970 Skellam JG (1951) Random dispersal in theoretical populations. *Biometrika* 38: 196–218  
971  
972 Sol D, Timmermans S, Lefebvre L (2002) Behavioural flexibility and invasion success in  
973 birds. *Anim Behav* 63: 495–502  
974  
975 Stöwe M, Bugnyar T, Heinrich B, Kotrschal K (2006) Effects of Group Size on Approach  
976 to Novel Objects in Ravens (*Corvus corax*). *Ethol* 112: 1079-1088  
977  
978 Van Oers K, Drent PJ, De Jong G, Van Noordwijk AJ (2004a) Additive and non additive  
979 genetic variation in avian personality traits. *Heredity* 93: 496-503  
980  
981 Van Oers K, Drent P, Goede P, Van Noordwijk A (2004b) Realized heritability and  
982 repeatability of risk-taking behaviour in relation to avian personalities. *Proc R Soc Lon*  
983 271: 65-73  
984  
985 Van Oers K, Klunder M, Drent P (2005) Context dependence of personalities, risk-taking  
986 behavior in a social and non-social situation. *Behav Ecol* 16: 716-723  
987  
988 Veit RR, Lewis MA (1996) Dispersal, population growth and the allee effect, dynamics of  
989 the house finch invasion of eastern North America. *Am Nat* 148: 255–74  
990  
991 Visalbergi E, Fragazsi D (1994) The behaviour of capuchin monkeys *Cebus apella*, with  
992 novel food, the role of social context. *Anim Behav* 49: 1089-1095  
993  
994 Ward JH (1963) Hierarchical grouping to optimize an objective function. *J Am Stat Asso*  
995 58: 236–244  
996  
997 Wauters AM, Richard-Yris MA, Talec N (2002) Maternal influences on feeding and general  
998 activity in domestic chicks. *Ethol* 108: 529-540  
999  
1000 Webb JK, Letnic M, Jessop TS, Dempster T (2014) Behavioural flexibility allows  
1001 an invasive vertebrate to survive in a semi-arid environment. *Biol Lett* 10 (2): 0131014  
1002  
1003 Wechsler B (1995) Coping and coping strategies, a behavioural view. *App Anim Behav Sci*



*Rodriguez et al.*

1004 43:123-134

1005

1006 Wilson DS (1998) Adaptive individual differences within single populations. *Phil Trans R*  
1007 *Soc Lond, B* 353: 199-205

1008

1009 Wright TF, Eberhard JR, Hobson EA, Avery ML, Russello MA (2010) Behavioural  
1010 flexibility and species invasions, the adaptive flexibility hypothesis. *Ethol Ecol Evol* 22:  
1011 393–404

1012

1013

1014

1015

1016

1017 **Acknowledgements**

1018 We thank Christine Aubry and Christophe Petton for taking care of the birds. We thank Dr.  
1019 Adrian Craig who corrected the English language. The study was funded by a grant from  
1020 INRA Scribe Ecology of Biological Invasions, CNRS and Rennes 1 University. Alexandra  
1021 Rodriguez was supported by a PhD grant from the French Ministry of Research

Rodriguez *et al.*

1 **Figure 1: Experimental design and chronology of the experiments conducted on the**  
 2 **three groups of starlings**

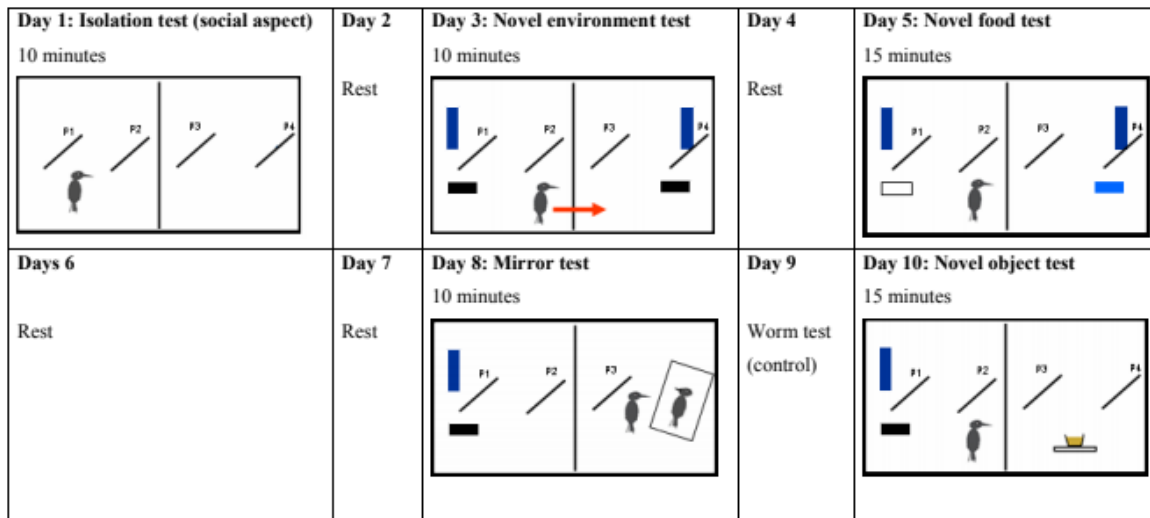

3  
 4 (The mirror test is the subject of another publication non presented here)

5  
 6  
 7 **Table 1: Behaviors recorded during the isolation and neophobia tests**  
 8

|                                        |                  |                                                                                    |
|----------------------------------------|------------------|------------------------------------------------------------------------------------|
| <b>Feeding</b>                         | Eat              | The bird pecks at pellets in the feeding dish or on the ground                     |
|                                        | Peck food        | The bird pecks at food                                                             |
|                                        | Drink            | The bird drinks water from the drinking trough                                     |
| <b>Maintenance behaviors</b>           | Preen            | The birds preens itself                                                            |
|                                        | Scratch          | The bird scratches itself with its legs                                            |
|                                        | Shake            | The bird ruffles its feathers and shakes them                                      |
|                                        | Shake head       | The bird shakes its head                                                           |
|                                        | Rub beak         | The bird rubs its beak on a perch                                                  |
| <b>Exploration</b>                     | Peck G           | The birds pecks with the beak on the ground                                        |
| <b>Vocalizations</b>                   | Call             | The bird calls                                                                     |
|                                        | Sing             | The bird sings                                                                     |
| <b>Mobility</b>                        | Fly              | The bird flies in the cage from one perch to another or from the ground to a perch |
|                                        | Walk G           | The bird walks on the ground                                                       |
|                                        | Walk P           | The bird walks on a perch                                                          |
| <b>Visual attention</b>                | Observe (Obs)    | The bird scans in several directions without moving                                |
|                                        | Gaze at food     | The bird looks at food for more than 1s without moving                             |
|                                        | Gaze at object   | The bird looks at the new object for more than 1s without moving                   |
| <b>Interaction with the new object</b> | Touch the object | The bird touches the object                                                        |
| <b>Close the eyes</b>                  | Close eyes       | The bird closes its eyes and does not move                                         |

9

Rodriguez *et al.*

10 **Figure 2 : Comparison of reactions to neophobia tests between the three groups**

11

12

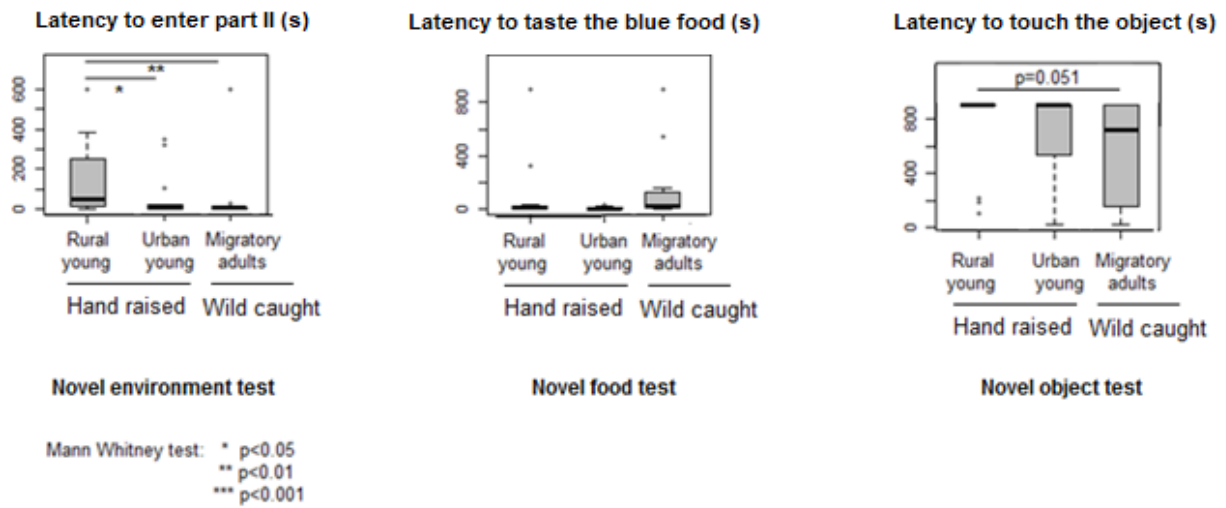

13

14

15

16

17

18

19

20

21

22

23

24

25

26

27

28

29

30

31

32

Rodriguez *et al.*

33 **Figure 3: Clusters from the hierarchical ascendant analysis on isolation test (C=Rural,**  
 34 **V=Urban, M=Migratory)**

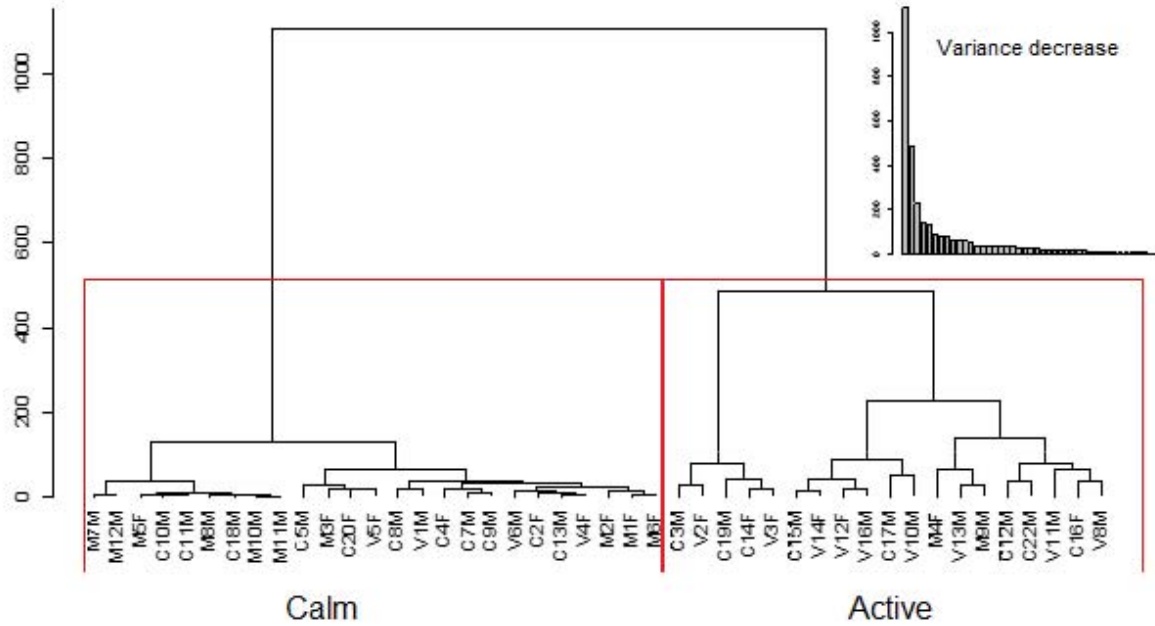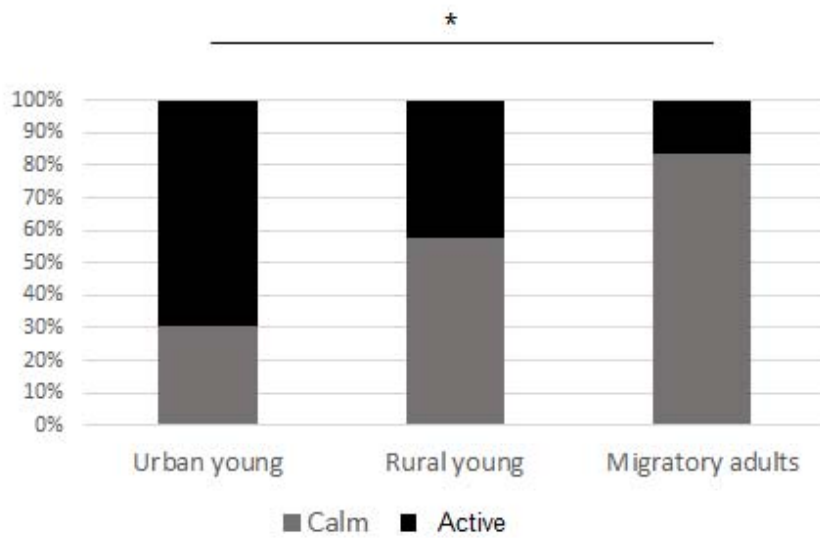

35  
 36  
 37  
 38  
 39  
 40  
 41  
 42

Rodriguez et al.

43 **Figure 4: Behaviors expressed by each cluster in the isolation test**

44

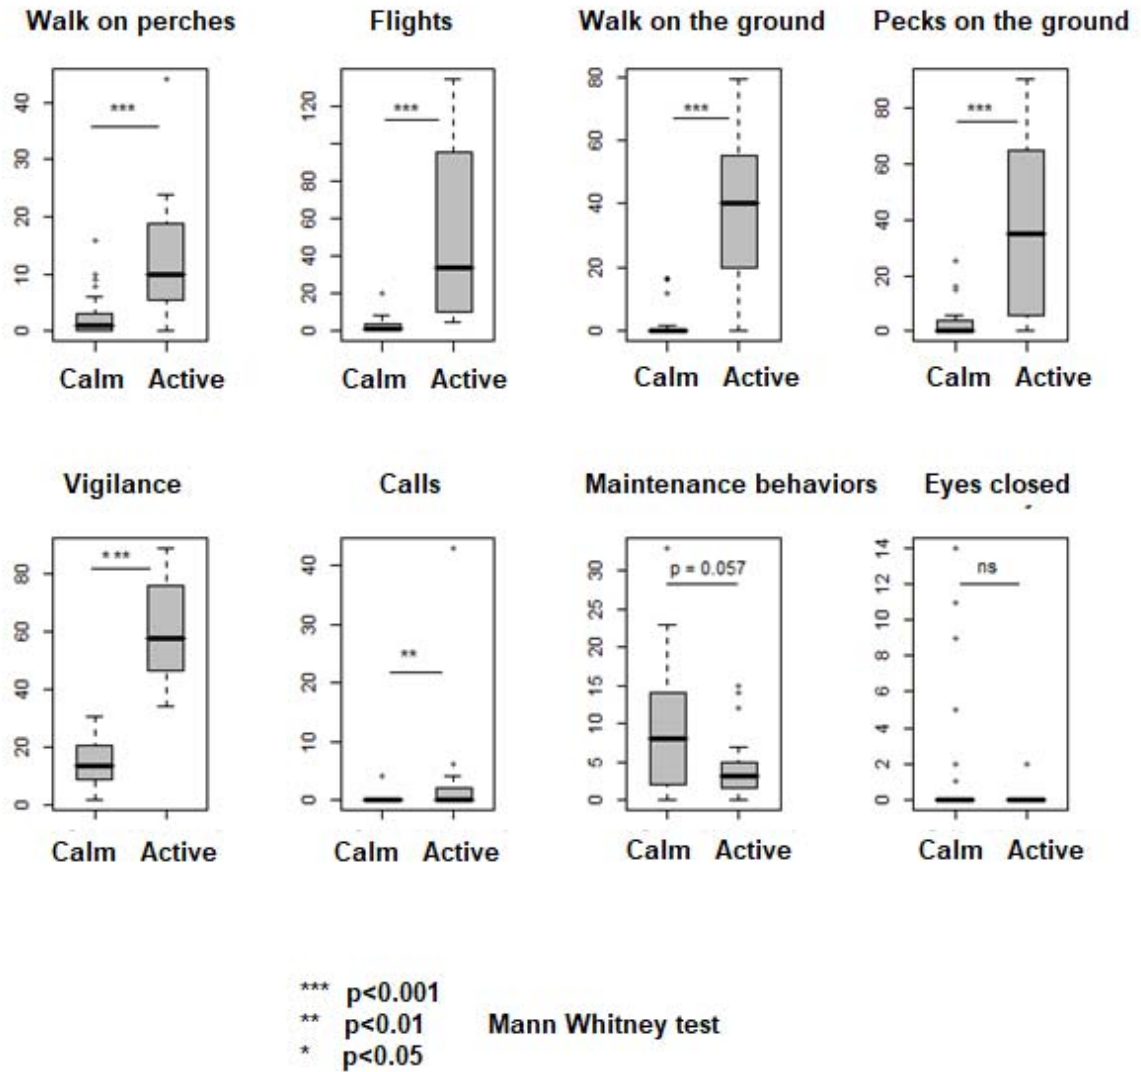

45

46

47

48

49

50

51

52

Rodriguez *et al.*

53 **Figure 5: Clusters from the hierarchical ascendant analysis of the novel environment**  
54 **test**

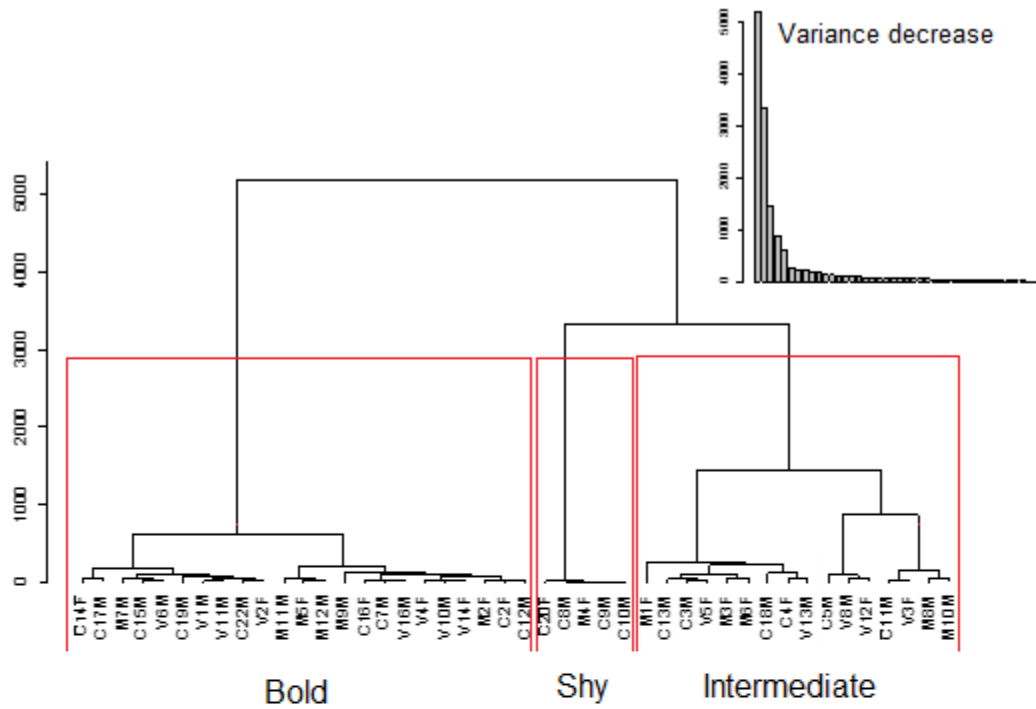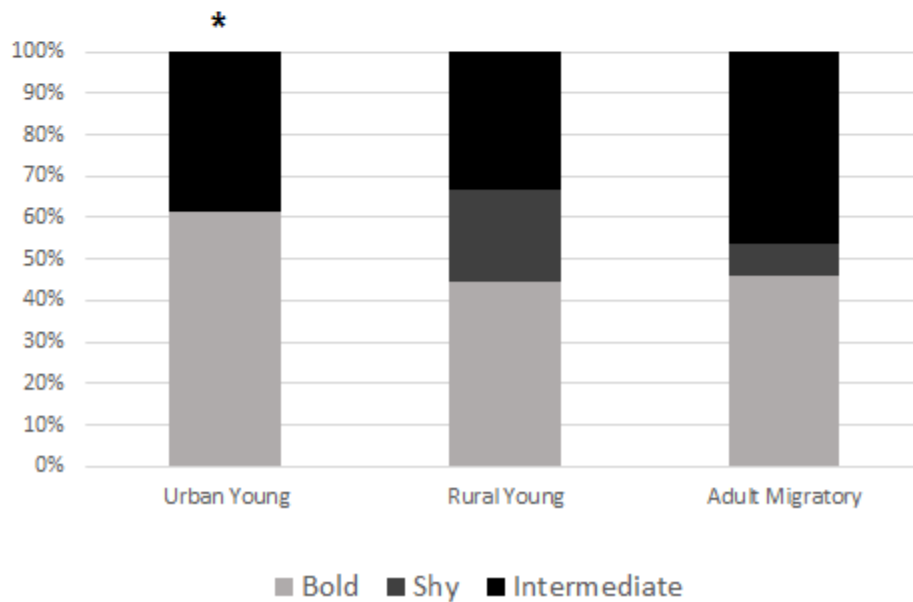

55  
56  
57  
58

Rodriguez *et al.*

59 **Figure 6: Behaviors expressed by each cluster in the novel environment test**

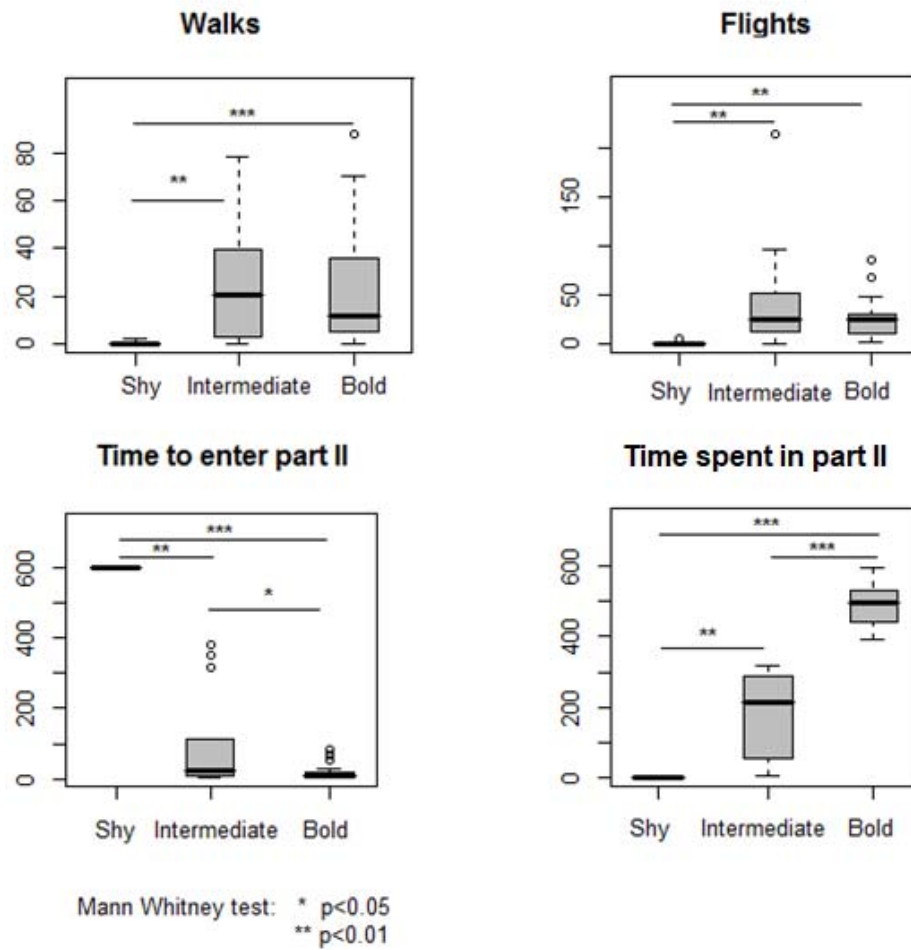

60  
61  
62  
63  
64  
65  
66  
67  
68  
69  
70  
71  
72  
73

Rodriguez et al.

74 **Figure 7: Clusters from the hierarchical ascendant analysis on novel food test**

75

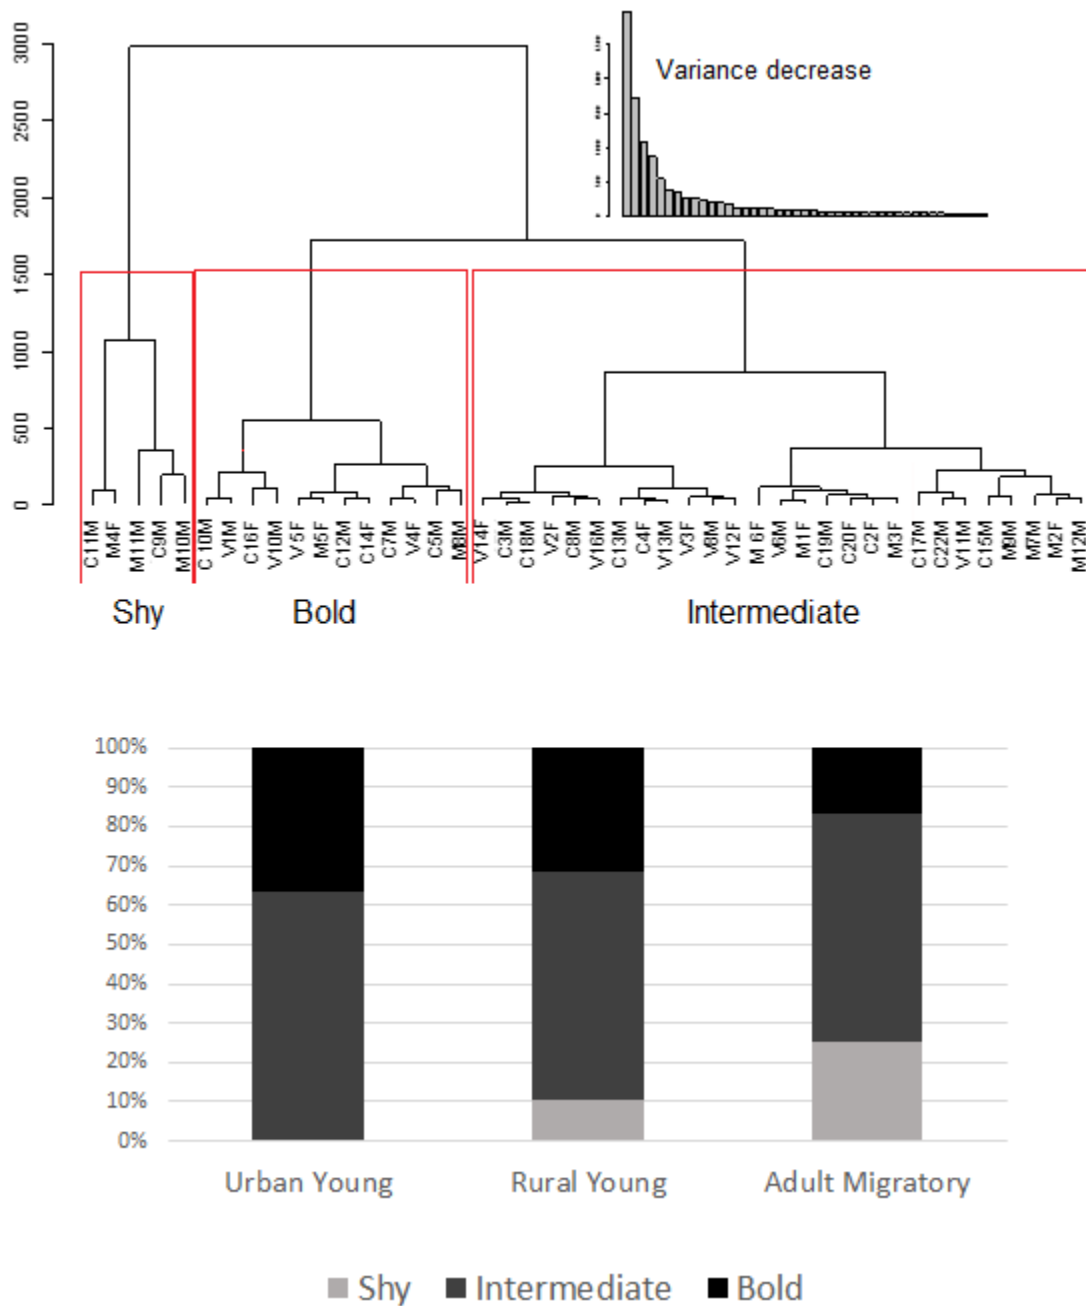

76

77

78

79

80

81

82

83

84

85



Rodriguez et al.

86 **Figure 8: Behaviors expressed by each cluster in the novel food test**

87

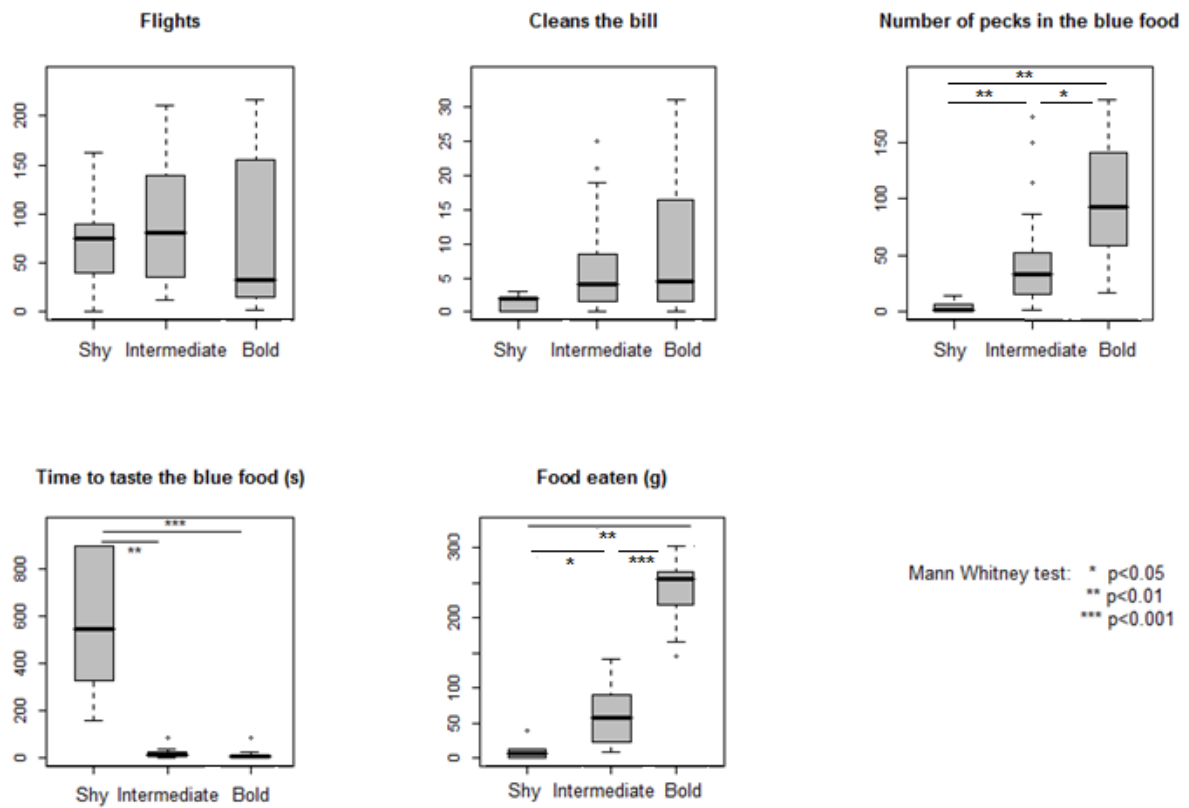

Mann-Whitney test: \* p<0.05  
\*\* p<0.01  
\*\*\* p<0.001

88  
89  
90  
91  
92  
93  
94  
95  
96  
97  
98  
99  
100  
101  
102  
103  
104  
105  
106

Rodriguez *et al.*

107 **Figure 9: Proportions of individuals that approached and that touched the object**

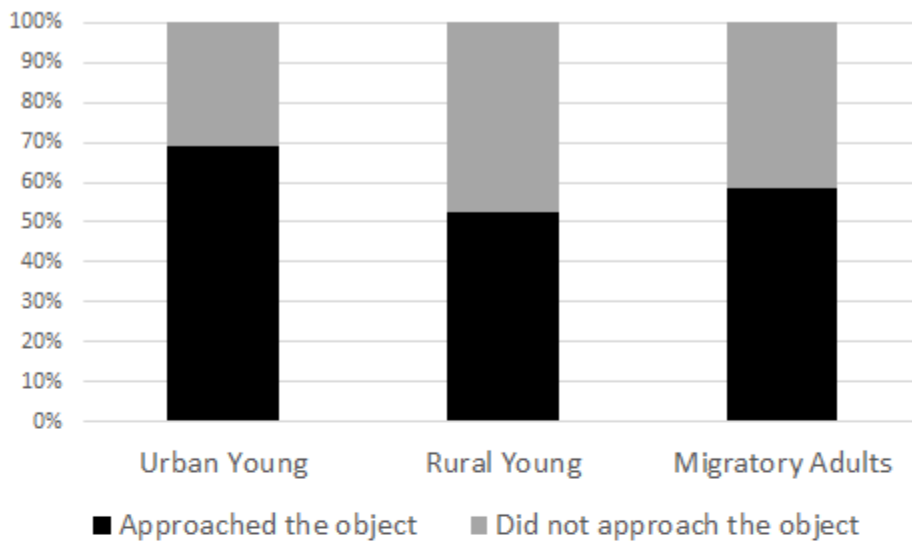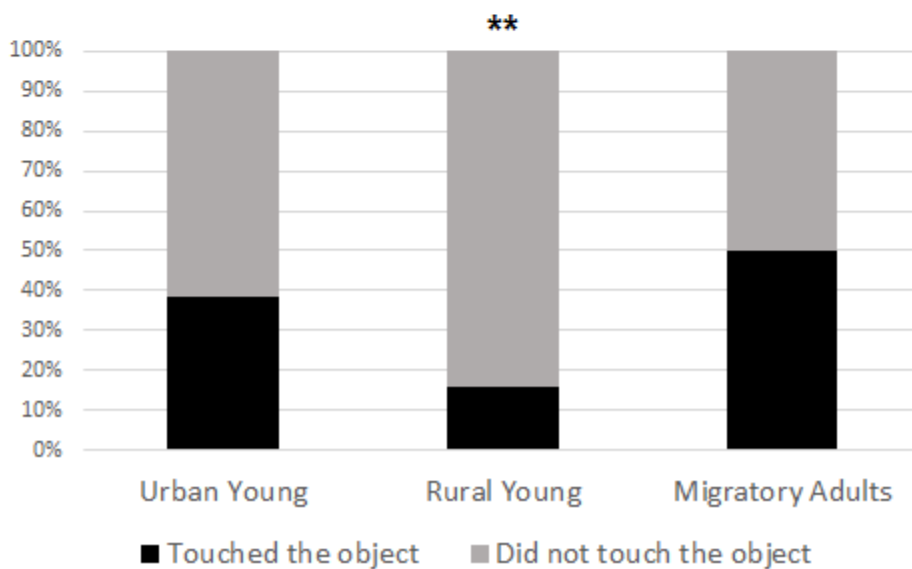

108

109

110

111

112

113

114

Rodriguez *et al.*

115 **Table 2: Consistencies in birds' behaviors between tests: p values for the correlation of**  
 116 **ranks in the Kendal test**  
 117

| Compared behaviors                        | Tests                                 |                                  |                                          |
|-------------------------------------------|---------------------------------------|----------------------------------|------------------------------------------|
|                                           | Isolation test /<br>Novel environment | Isolation /<br>Novel object test | Novel environment /<br>Novel object test |
| Walks on the perch                        | z=3.7 p=0.0002***                     | z=2.8 p=0.005**                  | ns                                       |
| Pecks on the ground                       | z=2.7 p=0.007**                       | ns                               | ns                                       |
| Vigilance frequencies                     | z=2.4 p=0.02*                         | z=4.34p<0.0001***                | z=3.9 p<0.0001***                        |
| Flights                                   | ns                                    | z=2.9 p=0.004**                  | ns                                       |
| Walking on the ground                     | ns                                    | z=2.05 p=0.04*                   | z=4.7p<0.0001***                         |
| Call frequencies                          | ns                                    | z=2.39 p=0.017*                  | ns                                       |
| Maintenance behaviors                     | ns                                    | ns                               | ns                                       |
| Eating behavior                           | -                                     | -                                | z=2.9 p=0.0039**                         |
|                                           | Isolation/<br>Novel food test         | Novel environment/<br>Novel food | Novel object/<br>Novel food              |
| Walks on the perches                      | z=2.6 p=0.009**                       | z=2.7 p=0.007**                  | z=2.8 p=0.005**                          |
| Flights                                   | z=2.5 p=0.013*                        | ns                               | ns                                       |
| Walks on the ground                       | z=2.5 p=0.013*                        | ns                               | ns                                       |
| Observation frequencies                   | z=3.1 p=0.0022**                      | z=2.6 p=0.009**                  | z=3.3 p=0.001***                         |
| Calling frequencies                       | z=3.2 p=0.0025**                      | ns                               | ns                                       |
| Pecks on the ground                       | ns                                    | ns                               | ns                                       |
| Maintenance behaviors                     | ns                                    | ns                               | ns                                       |
| Eating behavior                           | -                                     | ns                               | ns                                       |
| Gazing at the object / Gazing at the food |                                       |                                  | z=2.4 p=0.018**                          |

118

119

120

121
